# Supplementary material
Source: PubMed Central journal article supplement (PMC4025784)
Supplement: ml200312s_si_001.pdf [file ml200312s_si_001.pdf]

## Supporting Information

### Fungal bis-Naphthopyrones as Inhibitors of Botulinum Neurotoxin Serotype A

John H. Cardellina II,<sup>1</sup> Virginia I. Roxas-Duncan,<sup>1</sup> Vicki Montgomery,<sup>1</sup> Vanessa Eccard,<sup>1</sup> Yvette Campbell,<sup>1</sup> Xin Hu,<sup>2,†</sup> Gregory J. Tawa,<sup>2</sup> Ilja Khavrutskii,<sup>2</sup> Anders Wallqvist,<sup>2</sup> James B. Gloer,<sup>3</sup> Nisarga L. Phatak,<sup>3</sup> Ulrich Höller,<sup>3</sup> Ashish G. Soman,<sup>3</sup> Biren K. Joshi,<sup>3</sup> Sara M. Hein,<sup>3</sup> Donald T. Wicklow,<sup>4</sup> and Leonard A. Smith<sup>5,\*</sup>

<sup>1</sup>Division of Integrated Toxicology, U.S. Army Medical Research Institute of Infectious Diseases, Frederick, MD

<sup>2</sup>Biotechnology High Performance Computer Software Application Institute, Telemedicine and Advanced Technology Research Center, U.S. Army Medical Research and Materiel Command, Frederick, MD

<sup>3</sup>Department of Chemistry, University of Iowa, Iowa City, IA

<sup>4</sup>Bacterial Foodborne Pathogens and Mycology Research Unit, Agricultural Research Service, USDA, Peoria, IL

<sup>5</sup>Senior Research Scientist for Medical Countermeasures Technology, U.S. Army Medical Research Institute of Infectious Diseases, Frederick, MD

<sup>†</sup>Present address: NIH Chemical Genomics Center, National Human Genome Research Institute, NIH, Bethesda, MD

\*author to whom correspondence should be addressed: [Leonard.a.Smith1@us.army.mil](mailto:Leonard.a.Smith1@us.army.mil); 301-619-4238

## Table of Contents

|                                          |    |
|------------------------------------------|----|
| In Silico Screen                         | 3  |
| Figure 1S                                | 3  |
| Figure 2S                                | 4  |
| Bioassays                                | 4  |
| Isolation of Fungal Natural Products     | 5  |
| Figure 3S                                | 8  |
| Figures 4S                               | 9  |
| Figure 5S                                | 10 |
| Figure 6S                                | 11 |
| Figure 7S                                | 12 |
| Figure 8S                                | 13 |
| Computational Section – Modeling/Docking | 14 |
| Figure 9S                                | 15 |
| Figure 10S                               | 16 |
| Figure 11S                               | 22 |
| Table 1S                                 | 23 |
| References                               | 44 |

## In Silico Screen

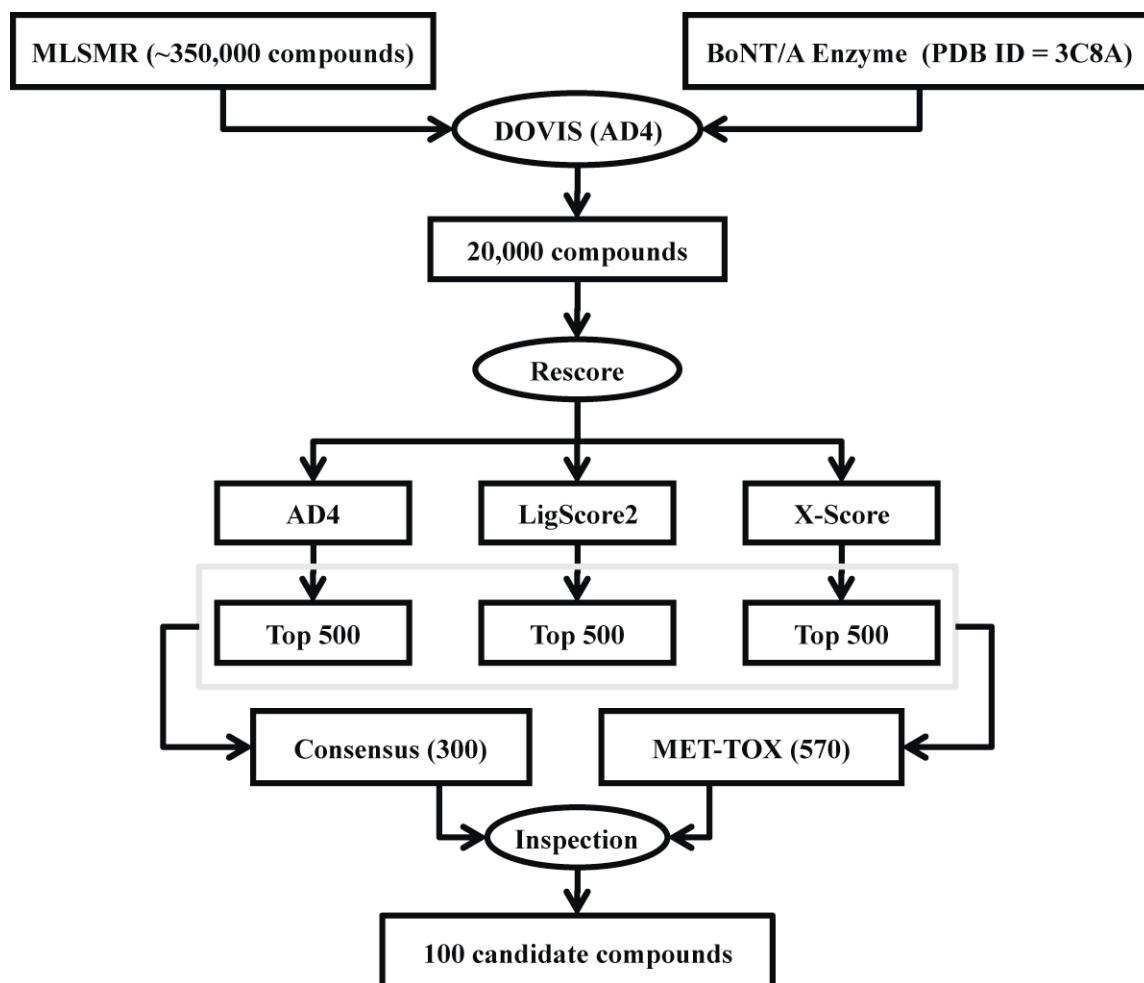

Figure 1S. Virtual screening protocol and flow diagram.

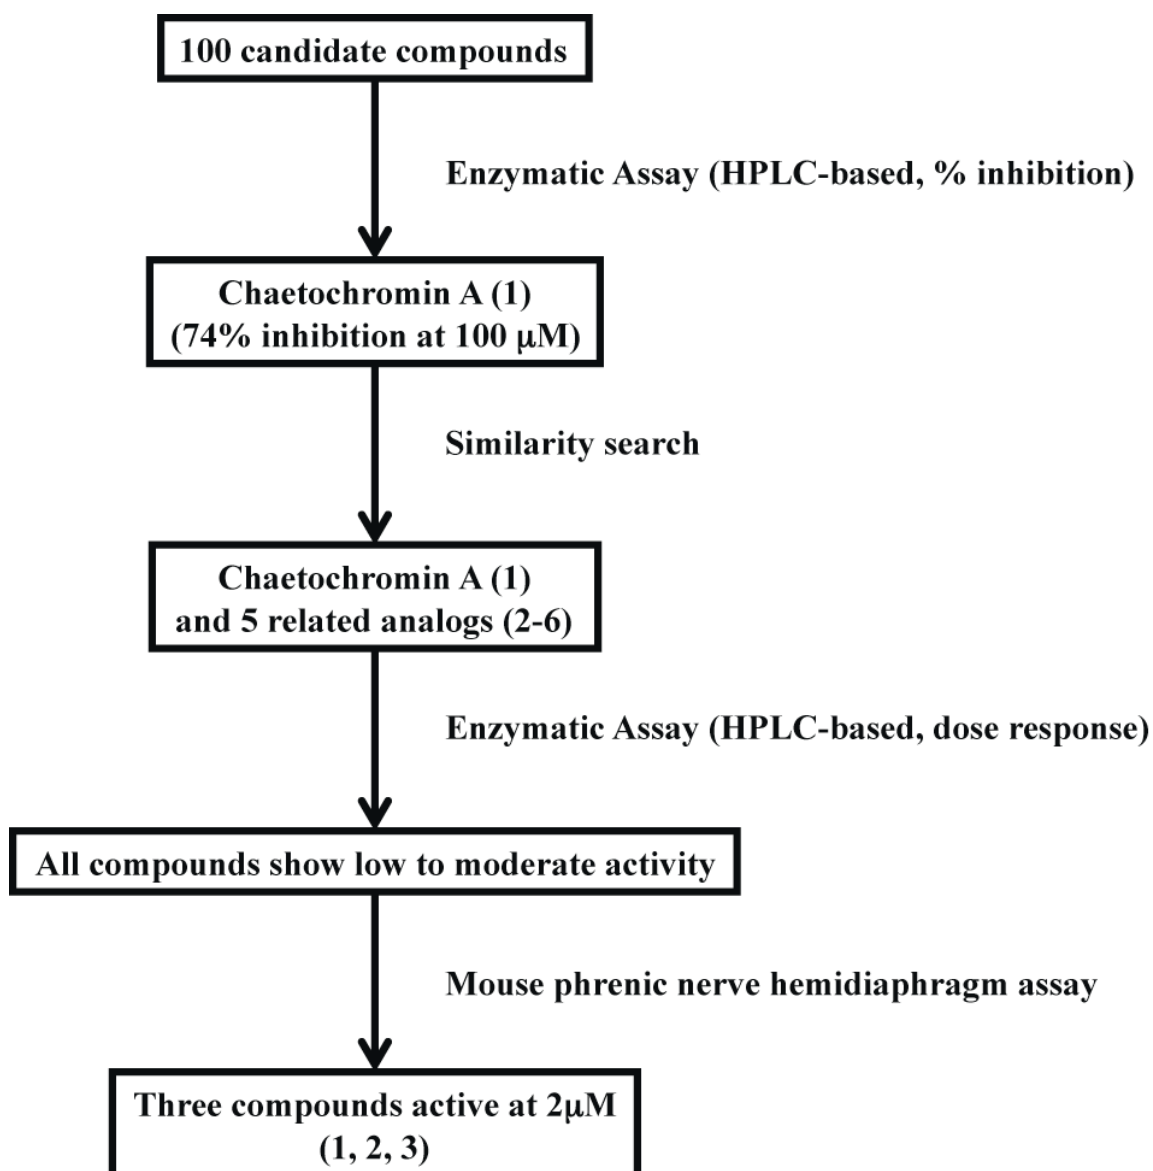

Figure 2S. Bioassay evaluation of candidate compounds.

## Bioassays

**Materials.** BoNT/A (Hall strain) was obtained from Metabionics (Madison, WI). The specific toxicity of the toxin was  $2.4 \times 10^8$  mouse i.p. LD<sub>50</sub>/mg of protein, as determined by a toxin titration procedure described previously.<sup>1</sup> The substrate for the HPLC protease assay was a peptide containing residues 187-203 of SNAP-25.<sup>2</sup> An Alliance HPLC System (2695 XE Separation Module and 2996 Photodiode Array Detector) and Empower/Millennium software were purchased from Waters (Milford, MA). HPLC columns (Hi-Pore C18, 0.45 x 25 cm) were obtained from Bio-Rad Laboratories (Hercules, CA).

**Botulinum neurotoxin (BoNT) inhibition assays.** HPLC assays of the protease activity of BoNT/A were carried out as previously described.<sup>3</sup> IC<sub>50</sub> (50% inhibitory concentration) values against BoNT/A LC were calculated from nine concentrations of compound by a log-probit analysis program using the statistical software GraphPad Prism 4 (GraphPad Software, La Jolla, CA).

The mouse phrenic nerve hemidiaphragm assay (MPNHDA) was conducted as previously described.<sup>3</sup> BoNT/A-induced paralysis was measured as a 50% loss of twitch tension evoked by nerve stimulation. Estimates of statistical significance were based on unpaired t-test (two-tailed). *P* values of <0.05 were considered significant. Statistical analysis was performed using SigmaPlot 10 (Systat Software, San Jose, CA).

Procedures used to obtain mouse tissues were conducted in compliance with the Animal Welfare Act and other federal statutes and regulations relating to animals and experiments involving animals, and adhered to principles stated in the *Guide for the Care and Use of Laboratory Animals*, National Research Council, 1996. The facility where this research was conducted is fully accredited by the Association for Assessment and Accreditation of Laboratory Animal Care International.

### **Isolation of Fungal Natural Products**

**Chaetochromin A.** A culture of *Chaetomium arcuatum* (syn. *Chaetomium virescens*) (NRRL 25243 = IMI 86456), originally isolated from soil collected in Lucknow, India) was subjected to solid-substrate fermentation on rice (8 x 50 g rice in 500-mL Erlenmeyer flasks). After 45 days, the cultures were extracted with 2 L of EtOAc, and the solvent was evaporated to afford approximately 3 g of an extract that was then partitioned between acetonitrile and hexane. A 100-mg portion of the acetonitrile-soluble fraction (2.2 g) was placed onto a silica gel column and eluted sequentially with hexane-acetone-MeOH mixtures of increasing polarity. A fraction eluting with 1:1 hexane-acetone (45 mg) was identified as chaetochromin A (**1**) by comparison of its <sup>1</sup>H NMR, <sup>13</sup>C NMR, CD, and MS data with literature values.<sup>4</sup>

**Talaroderxines A and B.** The culture of *Delitschia* sp. was a subculture of an isolate originally obtained from a sample of kangaroo dung collected by J. A Scott from scrubland in Australia at a site 20 km west of Balranald in March 1994. This isolate was assigned the accession number JS

300 in the D. Malloch culture collection at the University of Toronto. Six 2-L Erlenmeyer flasks containing PDB (400 mL each) were each inoculated with one-cm<sup>2</sup> agar plugs of *Delitschia* sp. from stock cultures maintained on PDA. The flasks were incubated at rt on rotary shakers at 150 rpm for 20 days. The culture broth was filtered to separate the mycelia from the broth. The broth (2.4 L) was extracted with EtOAc (3 x 1 L), and the organic layer was dried with MgSO<sub>4</sub> and evaporated to yield 1.45 g of an antibacterial extract. The EtOAc extract was subjected to VLC on silica gel using a step gradient from 100% hexane to 100% CHCl<sub>3</sub> and finally to 50% MeOH in CHCl<sub>3</sub>. The fraction eluting at 100% CHCl<sub>3</sub> (366 mg) was further purified by preparative reversed phase HPLC (C<sub>18</sub>, 8μ particles, 2.14 x 25 cm, 10 mL/min, 20-100% MeOH in H<sub>2</sub>O over 30 min) to afford talaroderxine A (**2**; t<sub>R</sub> 31.8 min; 12.6 mg) and talaroderxine B (**3**; t<sub>R</sub> 29.8 min; 18.2 mg). Talaroderxines A and B were identified by analysis of <sup>1</sup>H NMR, <sup>13</sup>C NMR, MS, CD, and [α]<sub>D</sub> data, and by comparison to literature values.<sup>5</sup>

**Secalonic acid A.** A culture of *Setophoma terrestris* (NRRL 25008), obtained as a colonist of an *Aspergillus flavus* sclerotium that was buried in field soil near Kilbourne, Illinois, was subjected to solid-substrate fermentation on rice (2x 200 g rice in 2.8-L Fernbach flasks). After 45 days, the cultures were extracted with 2 L of EtOAc. After evaporation of the solvent, the resulting extract (2.27 of 2.41 g) was subjected to VLC on silica gel, eluting sequentially with hexane-CH<sub>2</sub>Cl<sub>2</sub>-MeOH mixtures of increasing polarity. The fraction eluting with 15% MeOH in CH<sub>2</sub>Cl<sub>2</sub> (47 mg) was subjected to reversed phase (C<sub>18</sub>) HPLC using a linear gradient of 20-90% acetonitrile in 0.1% aqueous formic acid. A peak eluting at 26 min was identified as secalonic acid A (**4**; 5.0 mg) by comparison of its <sup>1</sup>H NMR, <sup>13</sup>C NMR, and MS data with literature values.<sup>6</sup>

**Cephalochromin.** A culture of *Cosmospora* sp. (syn. *Acremonium butyri*; NRRL 28291), obtained as a colonist of the stromata of *Hypoxylon* sp. found on a fallen hardwood log, Picture Ridge Drive, Peoria, IL collected by H.D. Thiers in May 1996) was subjected to solid-substrate fermentation on rice (50 g rice in a 500-mL Erlenmeyer flask). After 45 days, the culture was extracted with 0.5 L of EtOAc. A portion of the resulting extract (approximately 50 mg of 1.57 g total) was placed directly onto a column of Sephadex LH-20 and eluted sequentially with 4:1 CH<sub>2</sub>Cl<sub>2</sub>-hexane (with which the column had been packed), 3:2 CH<sub>2</sub>Cl<sub>2</sub>-acetone, and 1:4 CH<sub>2</sub>Cl<sub>2</sub>-acetone; five fractions were collected. The second fraction (41 mg) was essentially a pure compound, as judged by <sup>1</sup>H and <sup>13</sup>C NMR analysis. It had an orange color and accounted for most of the mass of the extract. This compound was identified as cephalochromin (**5**) by comparison of its NMR, MS, and optical rotation data with literature values.<sup>6,7</sup>

**Skyrin.** A culture of *Geomyces pannorum* (NRRL 22978), obtained as a colonist of an *Aspergillus flavus* sclerotium buried in sandy field soil near Kilbourne, Illinois, was subjected to solid-substrate fermentation on rice (2 x 50 g rice in 500-mL Erlenmeyer flasks). After 45 days, the cultures were extracted with 0.5 L of EtOAc. After evaporation of the solvent, the resulting extract (409 mg) was placed directly onto a column of Sephadex LH-20 and eluted sequentially with 4:1 CH<sub>2</sub>Cl<sub>2</sub>-hexane (with which the column had been packed), 4:1 CH<sub>2</sub>Cl<sub>2</sub>-acetone, 3:2 CH<sub>2</sub>Cl<sub>2</sub>-acetone, and 1:4 CH<sub>2</sub>Cl<sub>2</sub>-acetone; 14 fractions were collected. The eighth fraction (82 mg), eluted with 3:2 CH<sub>2</sub>Cl<sub>2</sub>-acetone, was essentially a pure compound, as judged by <sup>1</sup>H and <sup>13</sup>C NMR analysis. This metabolite was identified as *S*-(+)-skyrin (**6**) by comparison of its NMR, MS, and [α]<sub>D</sub> data with literature values.<sup>8</sup>





Figure 3S.  $^1\text{H}$  NMR spectrum of chaetochromin A (1) at 400 MHz in  $\text{CDCl}_3$

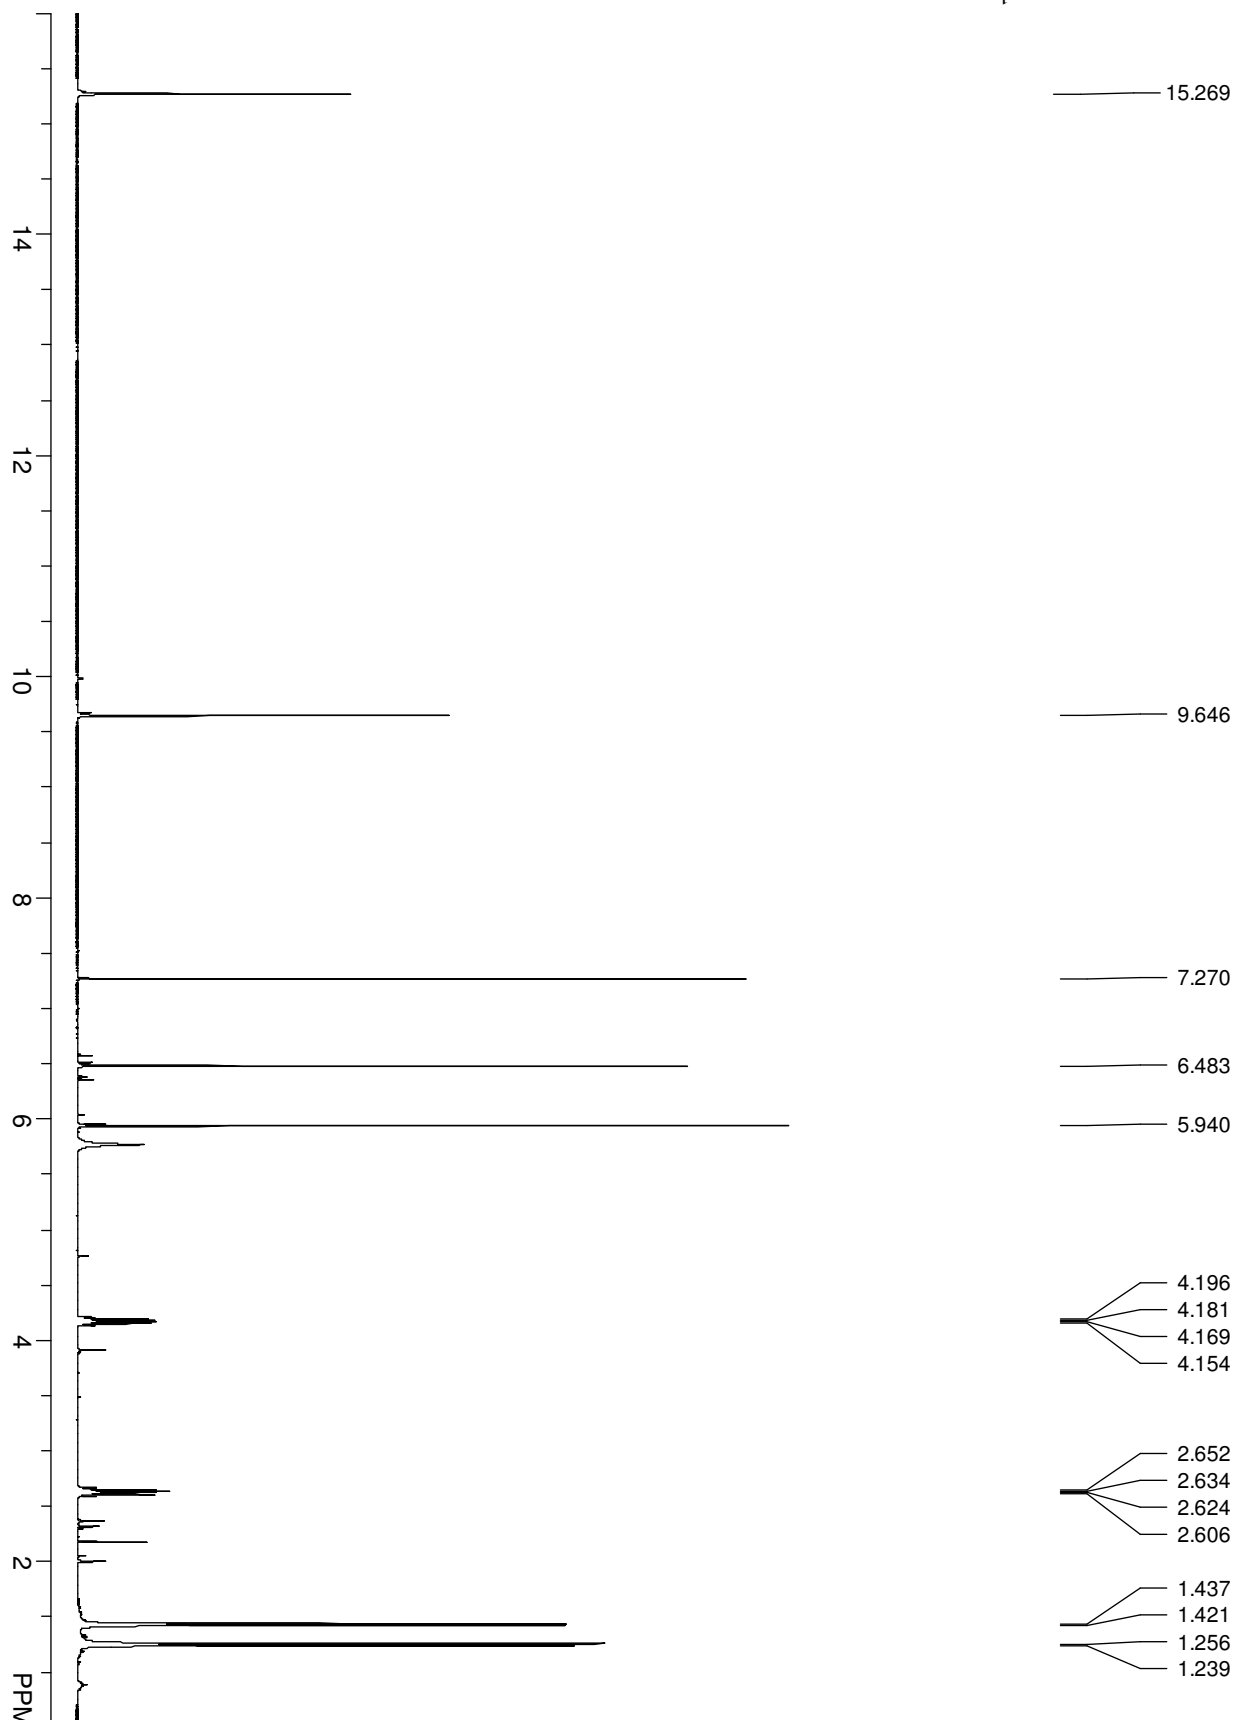

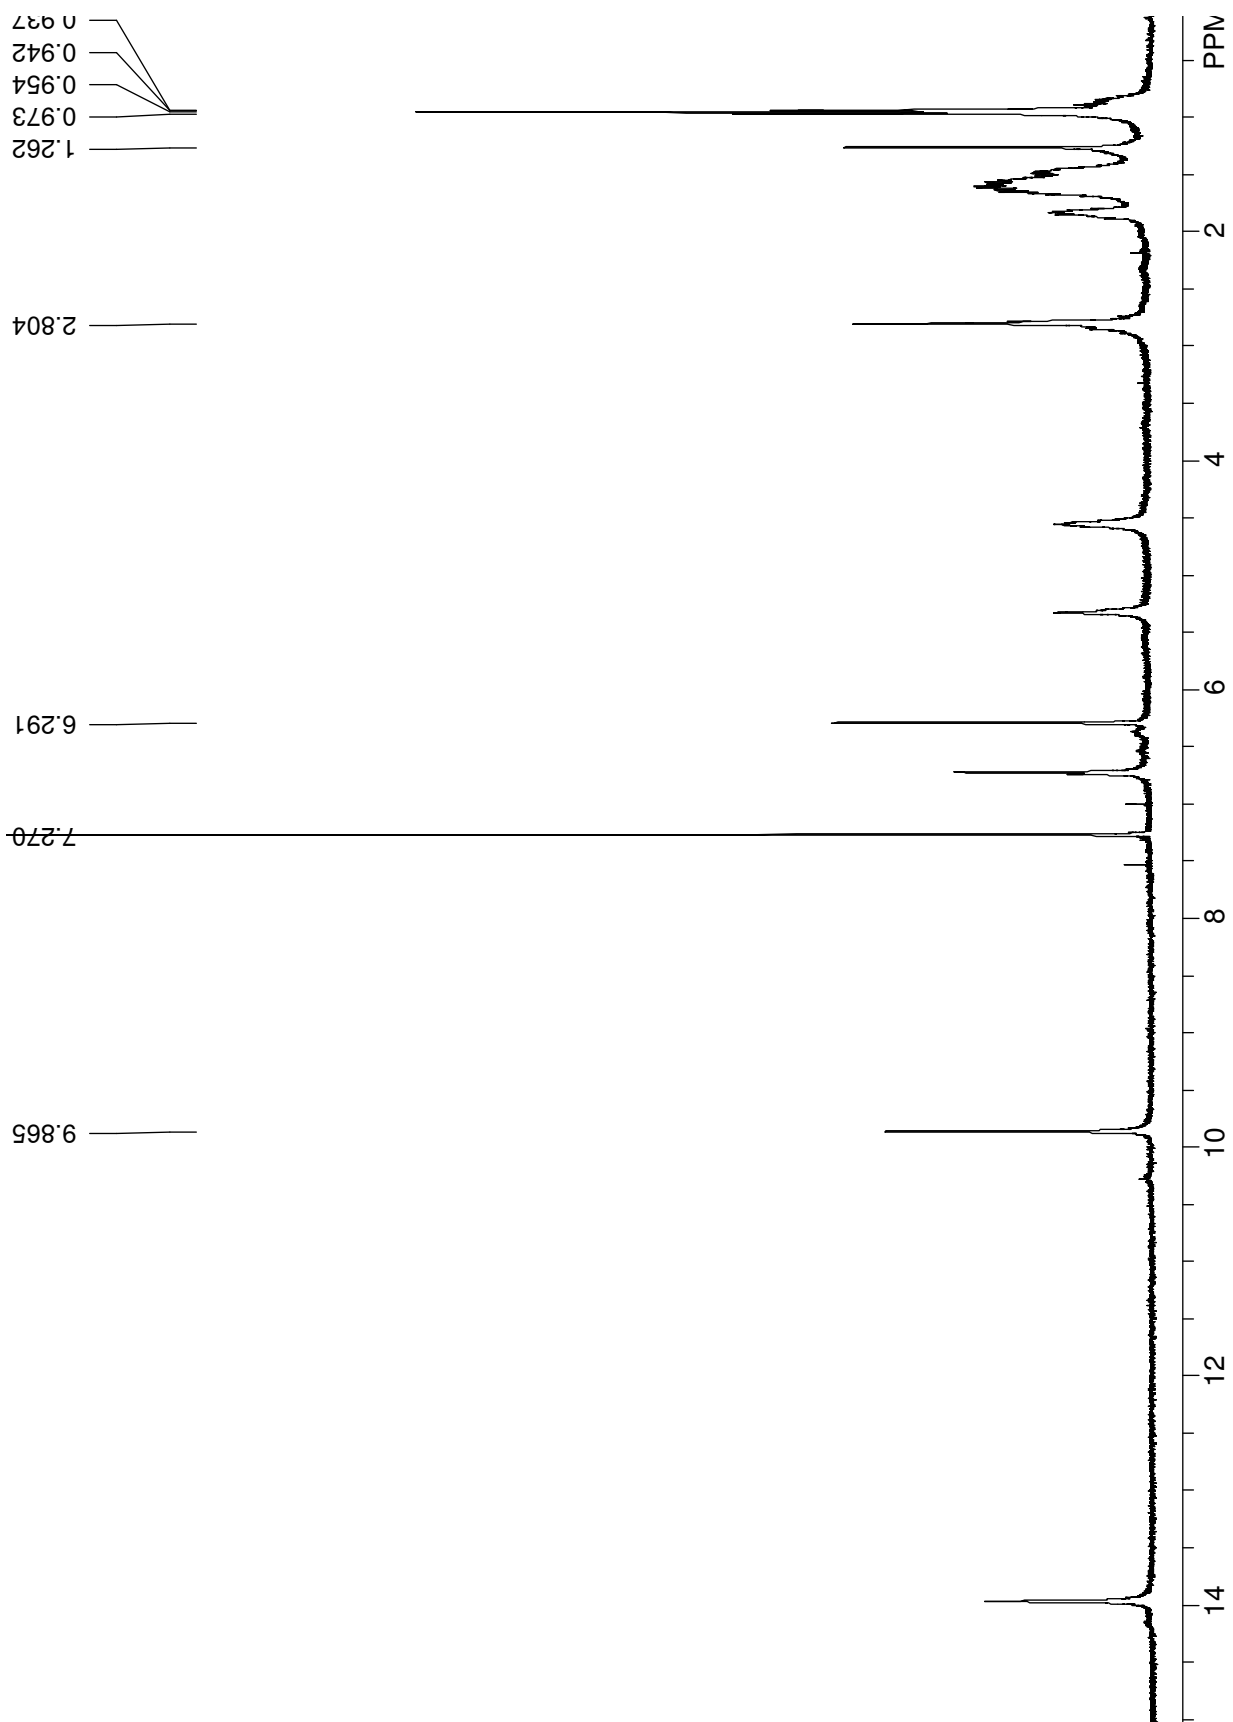

Figure 4S.  $^1\text{H}$  NMR spectrum of talaroderxine A (**2**) at 400 MHz in  $\text{CDCl}_3$

Figure S5.  $^1\text{H}$  NMR spectrum of talaroderxine B (**3**) at 400 MHz in  $\text{CDCl}_3$

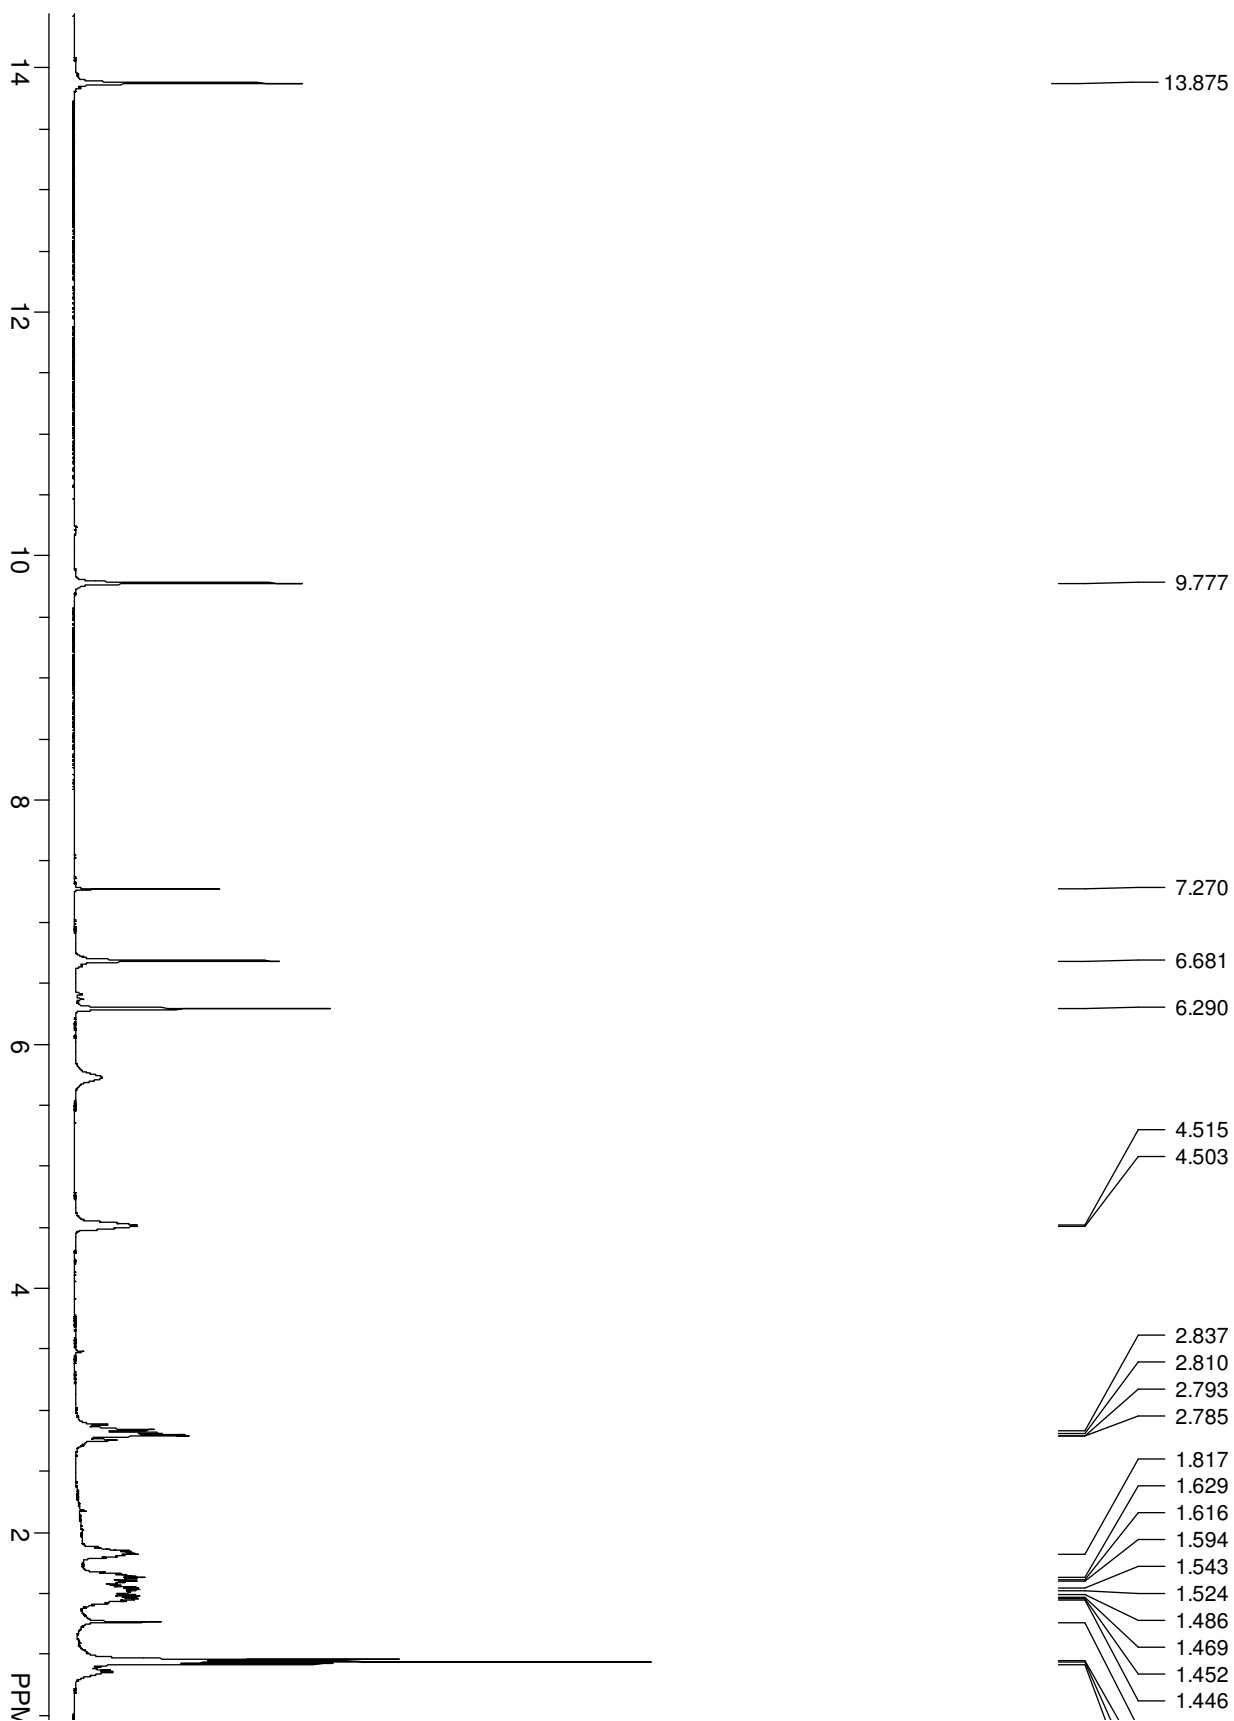

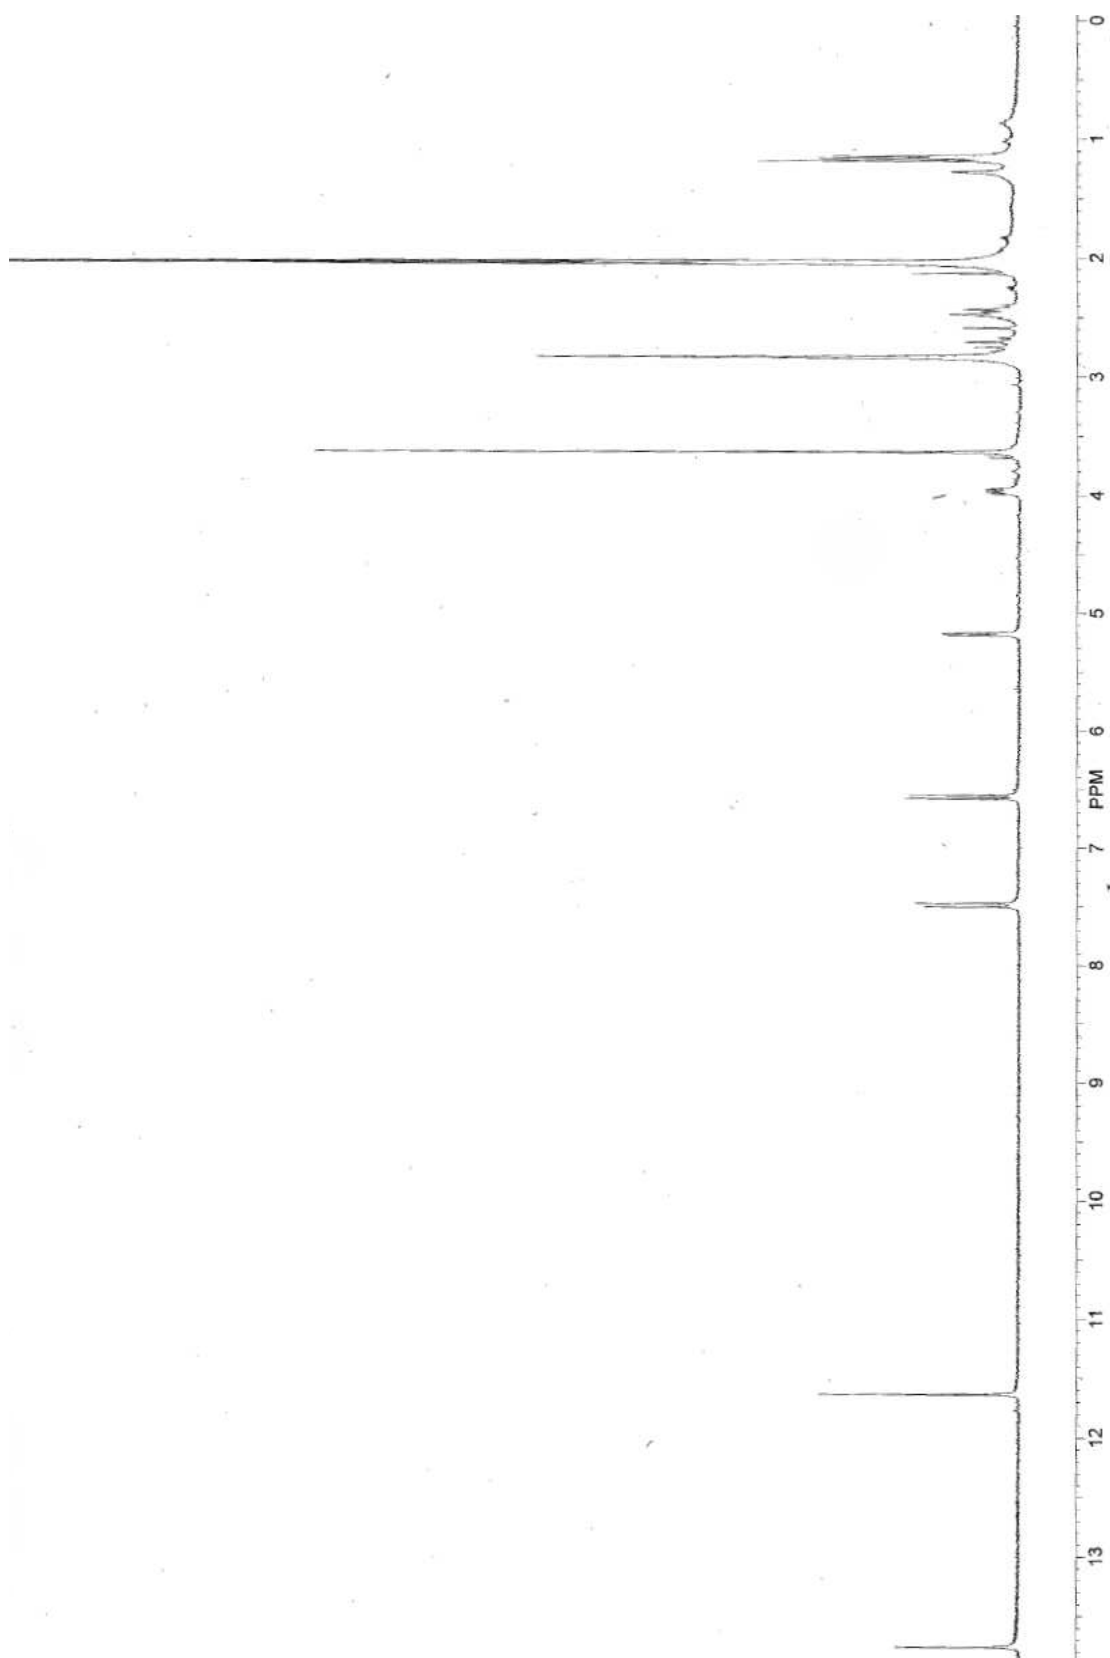

Figure 6S.  $^1\text{H}$  NMR Spectrum of Secalonic Acid (4) at 400 MHz in  $\text{CDCl}_3$

Figure 7S.  $^1\text{H}$  NMR spectrum of cephalochromin (**5**) at 400 MHz in  $\text{CDCl}_3$

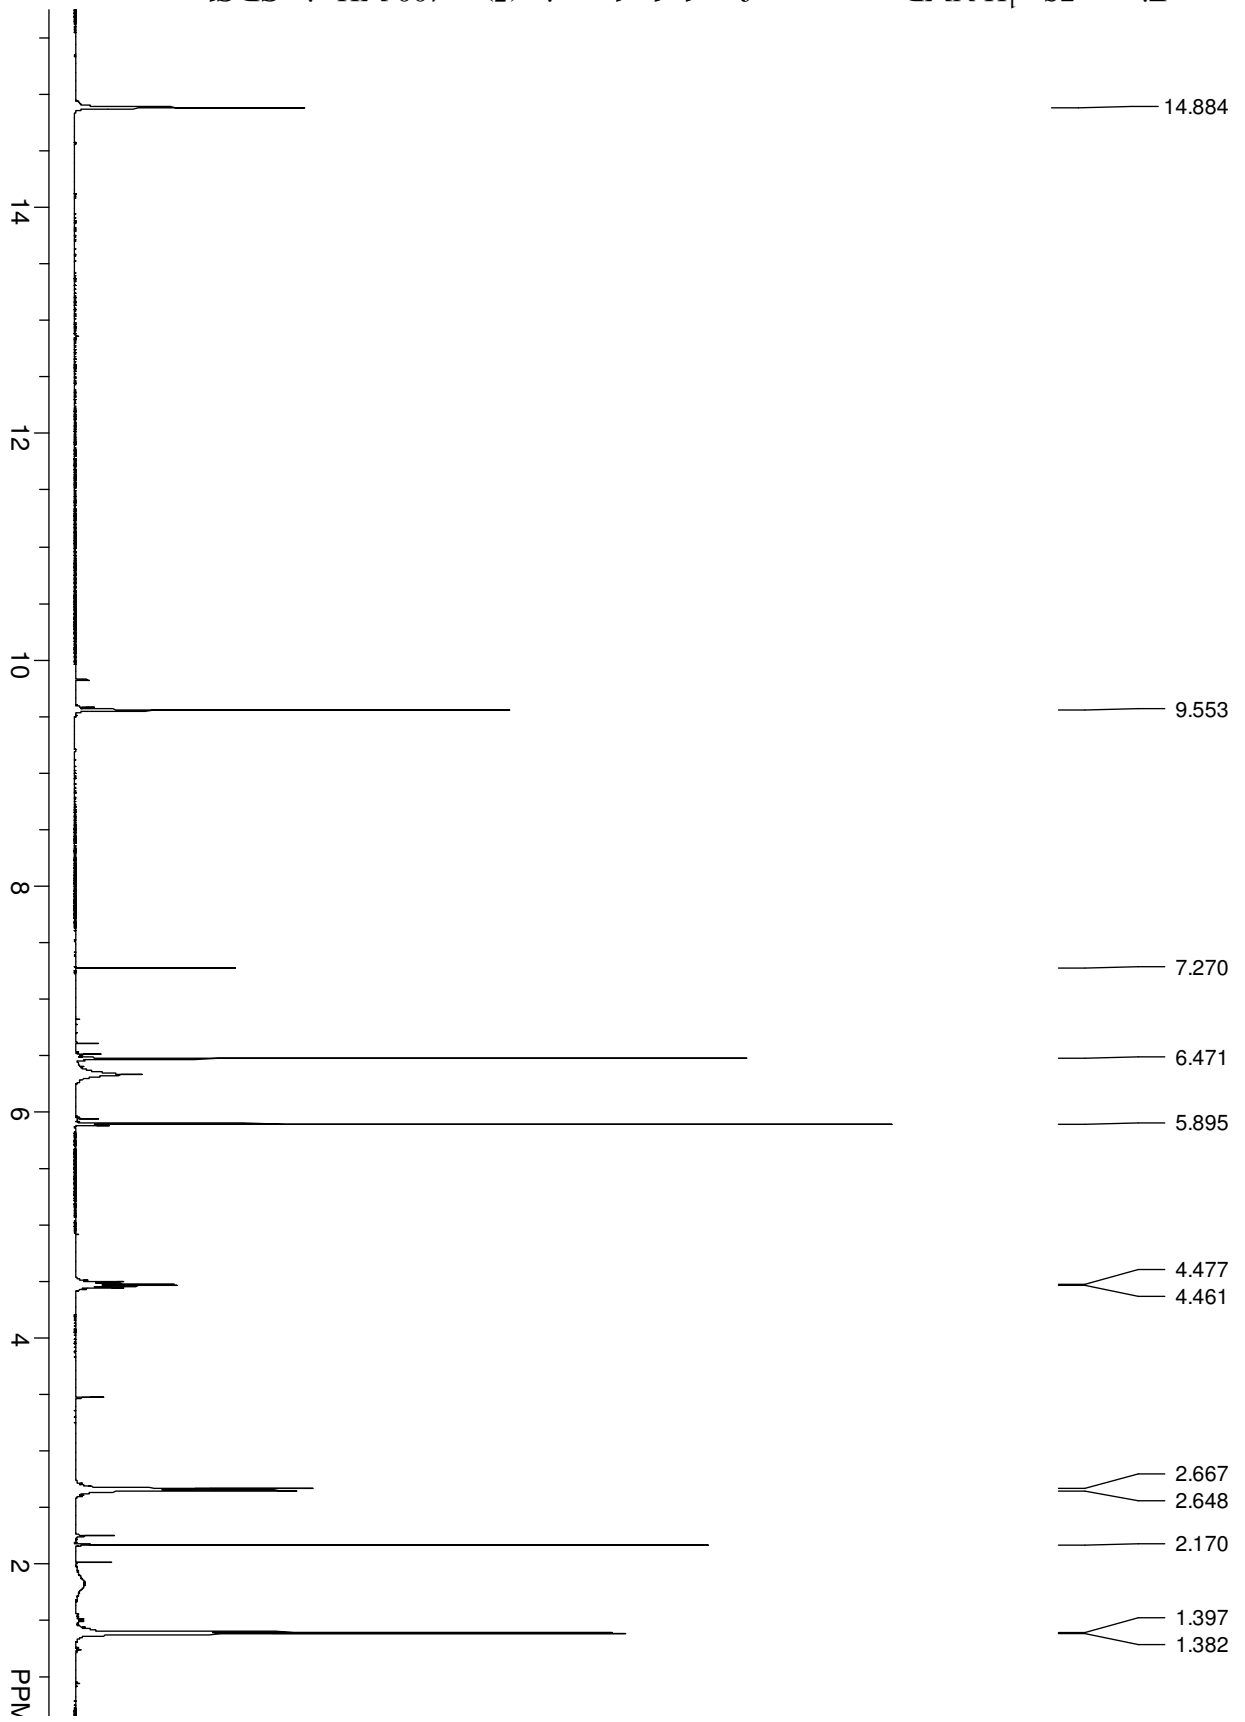

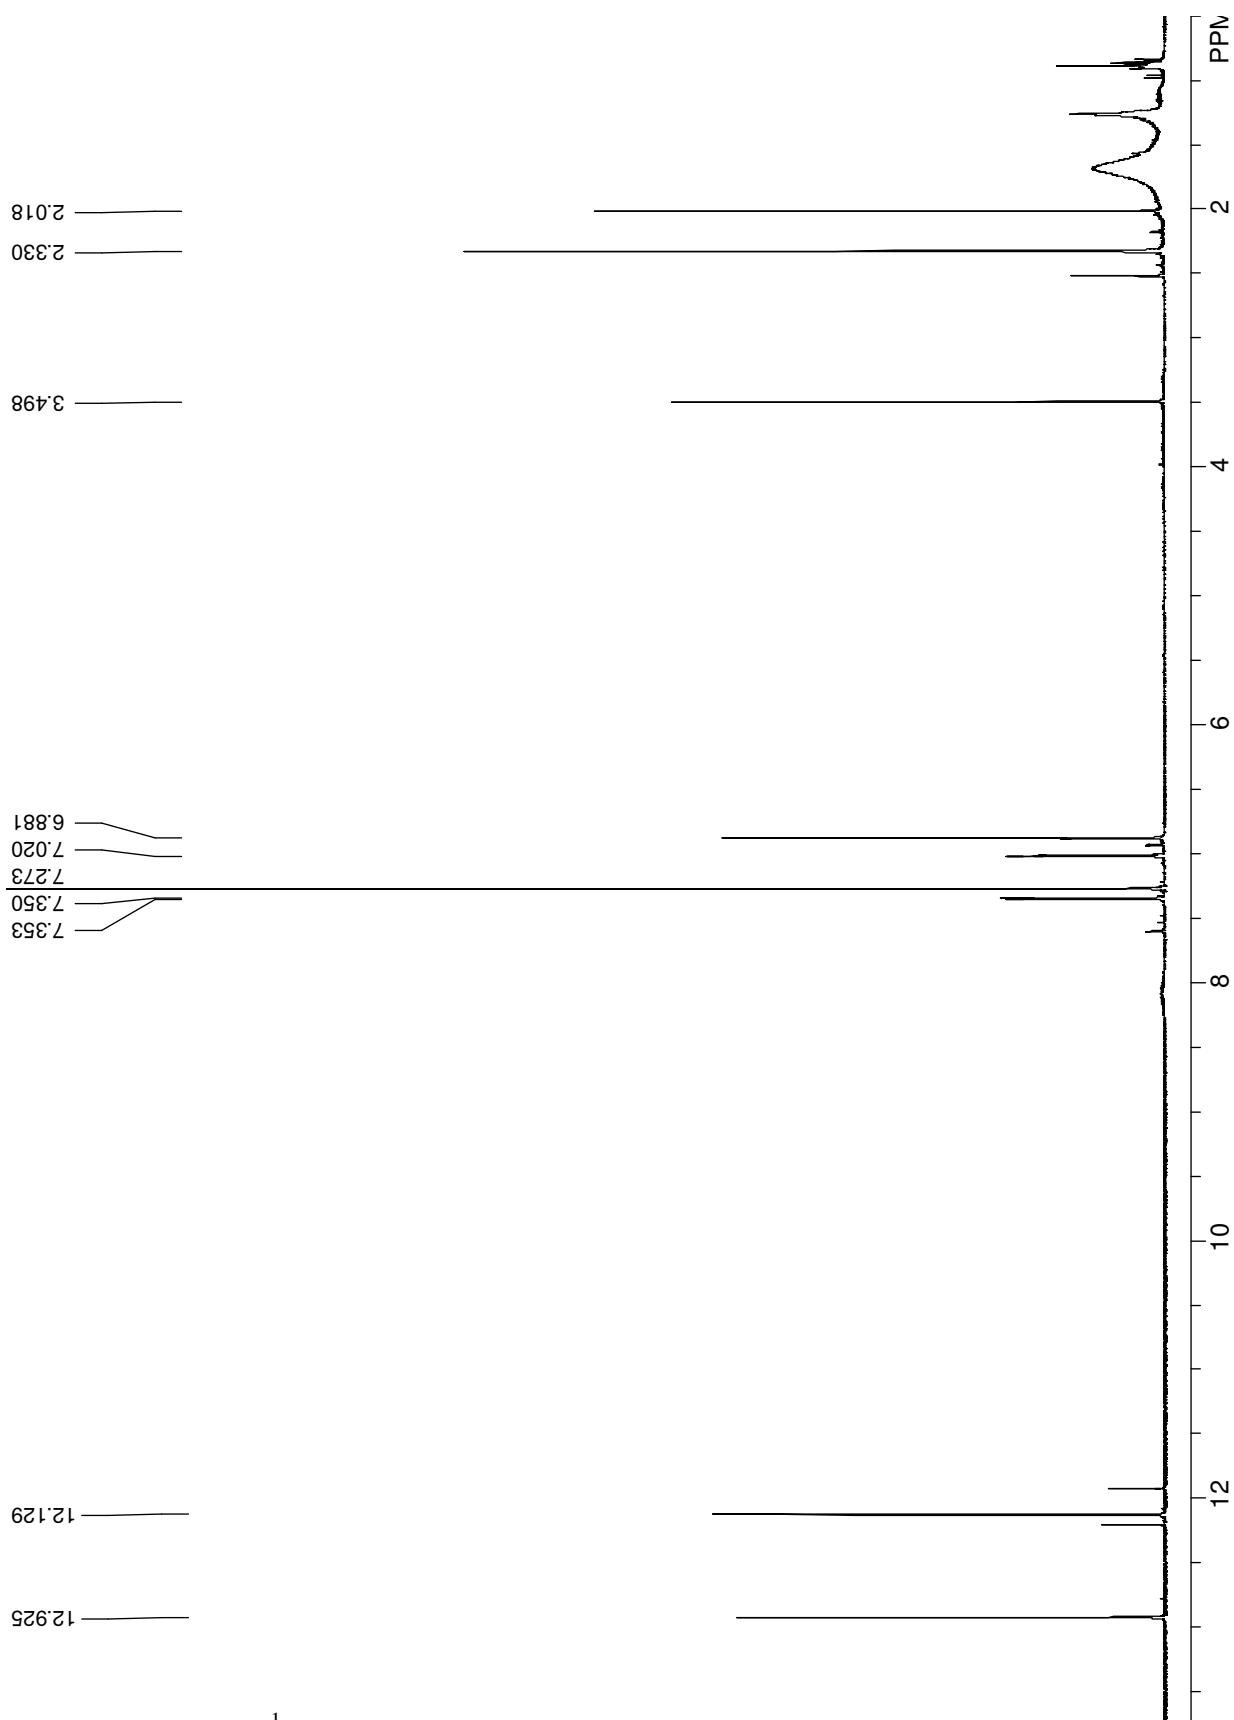

Figure 8S.  $^1\text{H}$  NMR spectrum of skyrin (6) at 400 MHz in  $\text{CDCl}_3$

The details of the BoNT/A structure setup were the same as in our previous work.<sup>9</sup> Small molecule parameters were derived using GAFF forcefield.<sup>10</sup> Charges were derived using AM1-BCC approach<sup>11,12</sup> as implemented in our in-house software described previously.<sup>9,13,14</sup> The parameters of all ligands are provided at the end of this document in mol2 format. For this work, we designed and parameterized a special reference molecule shown in Scheme 1. This molecule contains the 1,1'-binaphthyl core fused to cyclohexenone instead of pyrone.

All compounds, including reference compound, were docked into the BoNT/A structure using Autodock Vina.<sup>15</sup> Nine poses were saved for each compound and visually inspected to find common binding poses. Skyrin was the only compound that differed substantially in its binding poses from all the other compounds. It is worth noting that the docking software breaks the axial symmetry of the compounds as it is not cognizant of the higher order chirality. Therefore, docking poses contain both stereoisomers of the compounds with respect to the chiral axis. Skyrin differs from the rest of the compounds in the pattern of carbonyl and hydroxyl groups around the ring. To get the complex of skyrin in the selected consensus pose corresponding to A stereoisomer, its coordinates were rebuilt from the corresponding complex of BoNT/A with the reference compound.

For accelerated sampling of the multiple hydroxyl groups of the compounds studied in this work, we derive the unphysical reference state for Thermodynamic Integration by collapsing all of hydrogen atoms of the reference compound (Scheme 1) onto the corresponding oxygen and carbon atoms. Note that the reference structure lacks asymmetric carbon atoms. The lack of rotatable OH groups in the unphysical reference structure helps boost rotations of the hydroxyl groups in all of the real compounds studied here. This is achieved with the help of recently developed Single Reference Thermodynamic Integration (SRTI) method augmented with Hamiltonian Replica Exchange (HREX).<sup>13,14</sup>

For the HREX-SRTI simulations reported in this work, we used soft-core potentials with  $p = 1$  (refer to GROMACS manual for notation used in soft-core potentials) and optimized parameters.<sup>9</sup> Specifically, we used previously optimized<sup>14</sup> values of the  $\alpha = 0.4$ . Furthermore, due to the presence of large number of hydroxyl groups in the compounds the H atoms of which are lacking the vdW parameters, we optimized the value of  $\sigma$  from its default value of 0.3 to 0.25 that gives better results. This is first time we attempted optimization of the  $\sigma$  parameter of the soft core potential within HREX-SRTI.

HREX-SRTI simulations involved running two independent simulations in water and solvated protein environment for each ligand. Hence the standard deviations provided were derived from two independent simulations in each leg of cycle and relative to the chaetochromin A. We employed 24 windows in both protein and water simulations. The production runs were 1 ns long in each window with a total of 1000 exchange steps. Each window was running on 8 cpu cores for approximately 48 hours. All the simulations were performed on DoD's Mana MHPCC supercomputer. Coordinates were saved every 1 ps. Unless otherwise stated, the details of MD simulations were the same as in our previous work.<sup>14</sup> The HREX-SRTI trajectories for the physical state of the complexes were merged using our in-house tools prior to analysis. GROMOS-style clustering was done using *g\_cluster* program of GROMACS with a RMSD cutoff of 0.05 nm.<sup>16,17</sup> During clustering, the complex frames were fitted using  $Zn^{2+}$ , heavy atoms of the bound ligands and  $C\alpha$  atoms of the rigid structural elements of the protein (residues 164-167; 184-187; 192-196; 217-233 and 260-266). Centroids of the clusters that had at least 10% of the total population were retained. The top clusters were used to generate the figures in the main text. Ligand-protein interactions were analyzed in 2D projections using MOE software.<sup>18</sup>

Figure 9S. The compound used to generate parameters of the single reference for HREX-SRTI simulations.

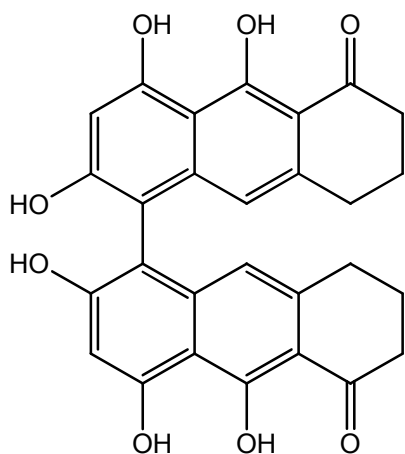



Figure 10S. 2-D depiction of the ligand-protein interactions of the A and B stereoisomers of selected compounds in corresponding consensus bound states with BoNT/A from Autodock Vina.

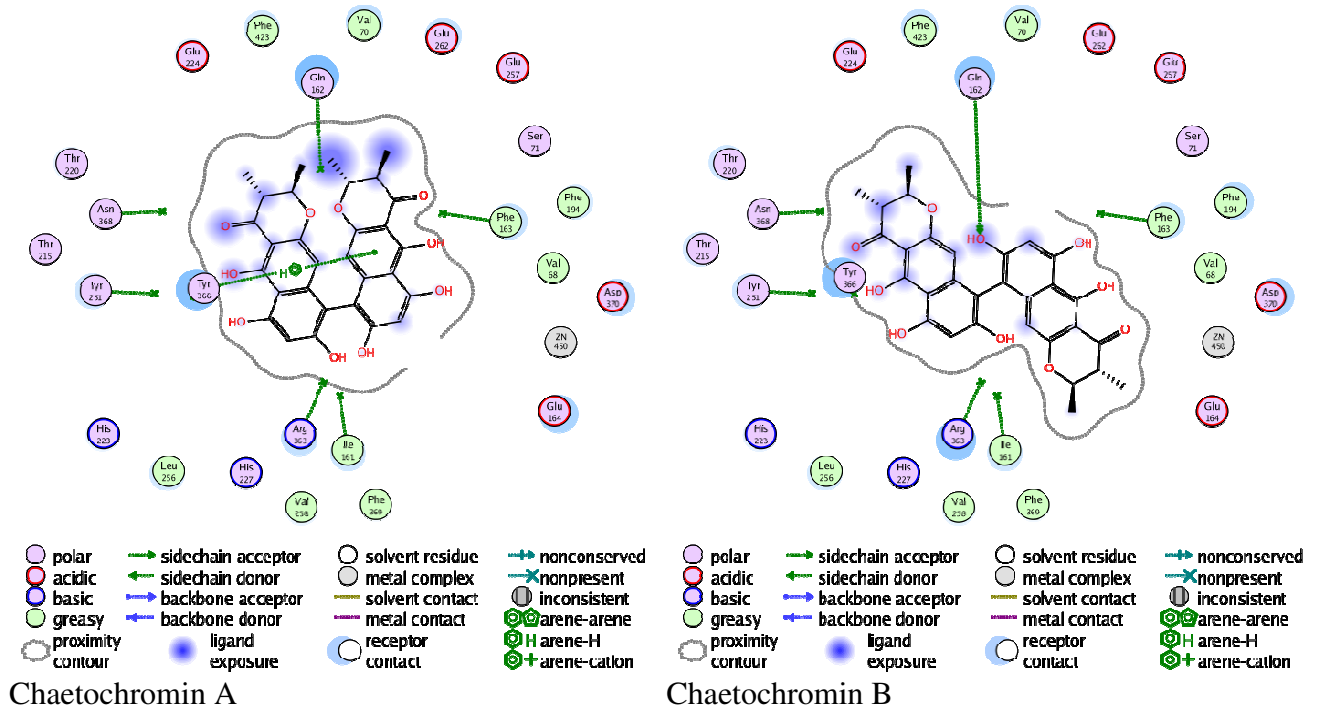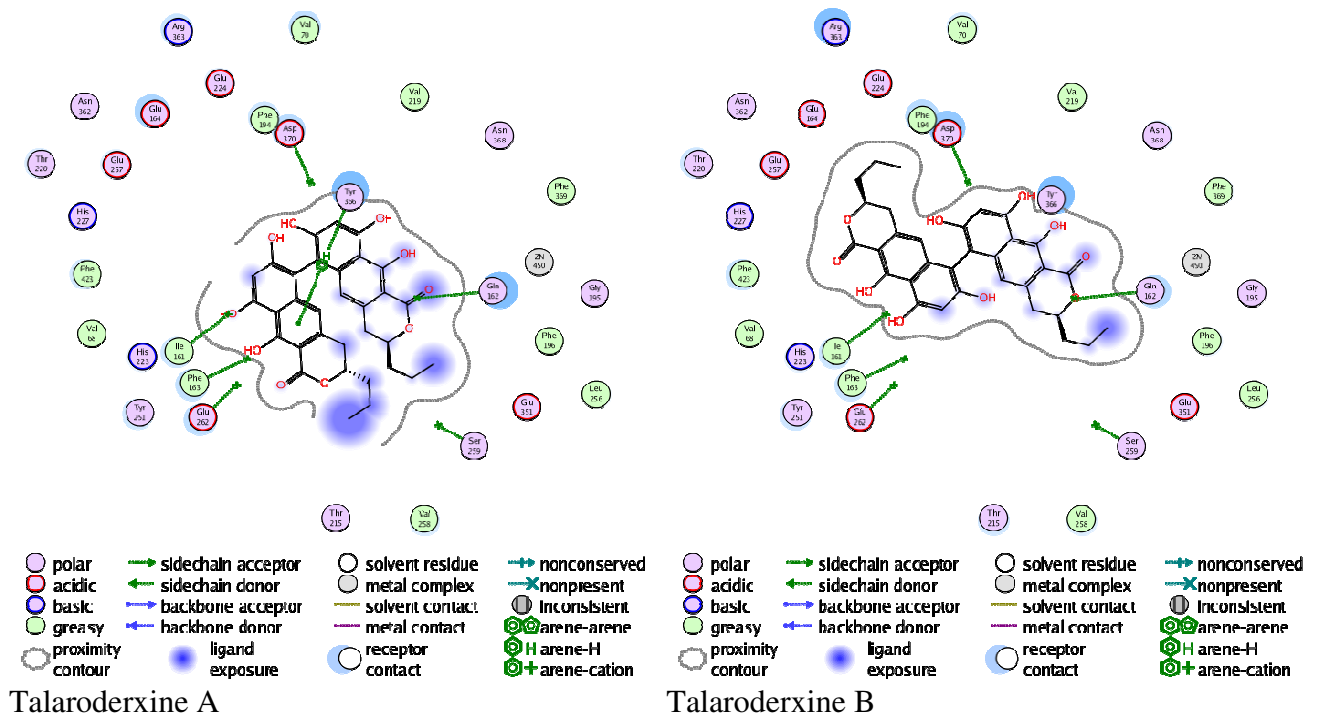

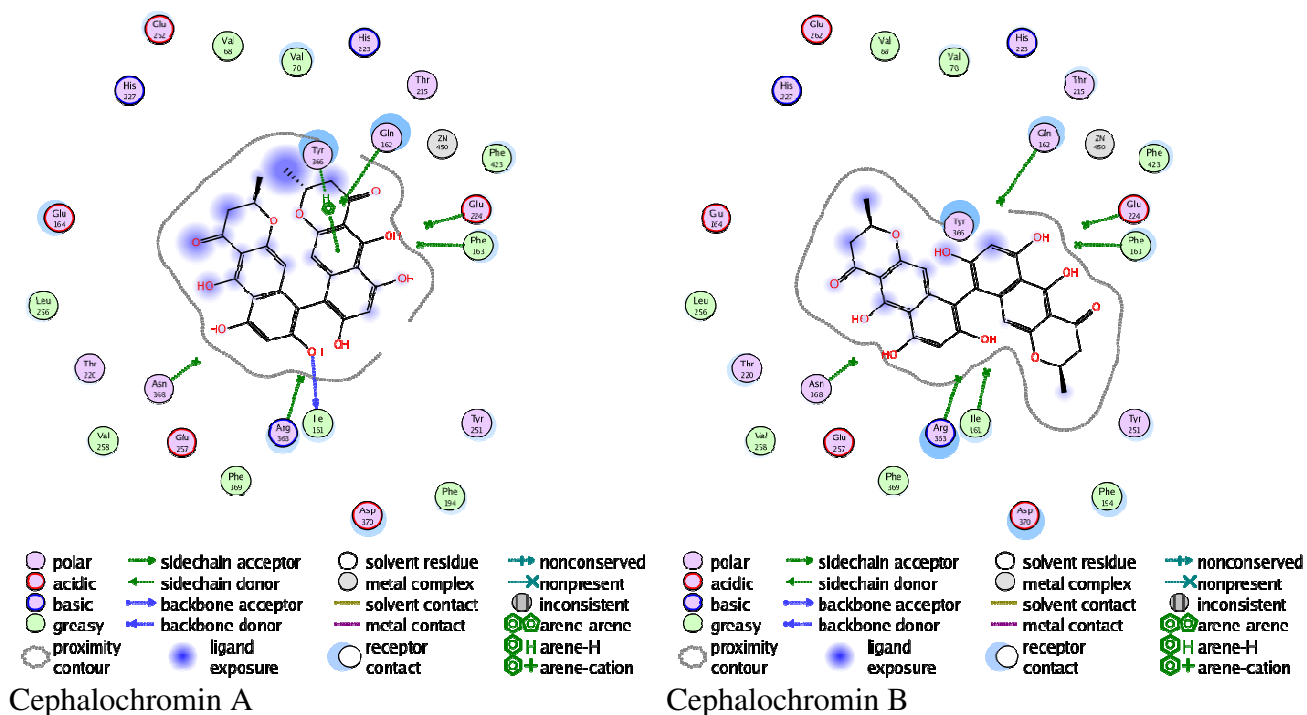

Figure 2S. 2-D depiction of the ligand-protein interactions of the A stereoisomers of studied compounds with BoNT/A in the most populated clusters from HREX-SRTI simulations.

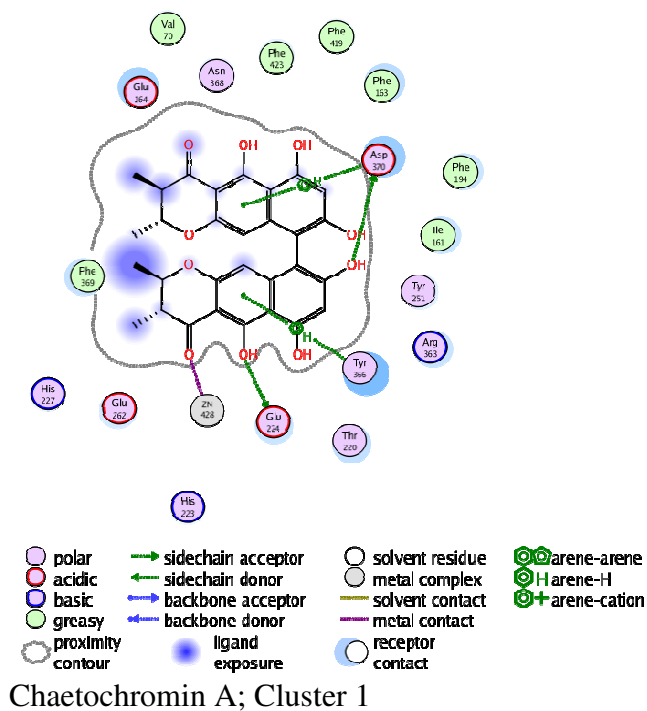

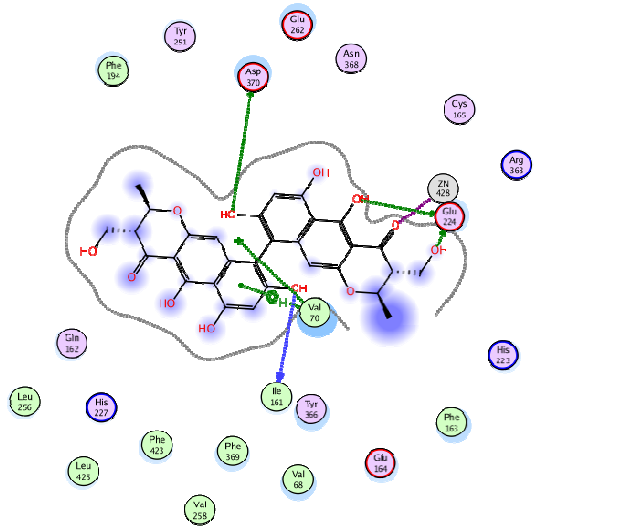

- polar
- acidic
- basic
- greasy
- proximity contour
- sidechain acceptor
- sidechain donor
- backbone acceptor
- backbone donor
- ligand exposure
- solvent residue
- metal complex
- solvent contact
- metal contact
- receptor contact
- nonconserved
- X nonpresent
- inconsistent
- arene-arene
- H arene-H
- + arene-cation

Hypothetical 7H A; Cluster 1

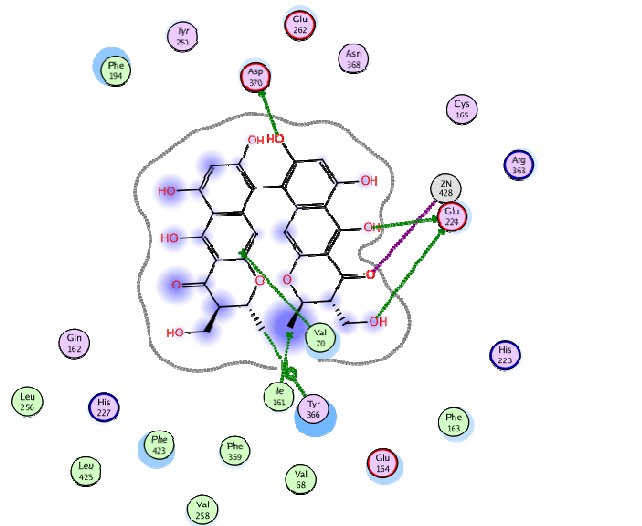

- polar
- acidic
- basic
- greasy
- proximity contour
- sidechain acceptor
- sidechain donor
- backbone acceptor
- backbone donor
- ligand exposure
- solvent residue
- metal complex
- solvent contact
- metal contact
- receptor contact
- nonconserved
- X nonpresent
- inconsistent
- arene-arene
- H arene-H
- + arene-cation

Hypothetical 7H A; Cluster 2

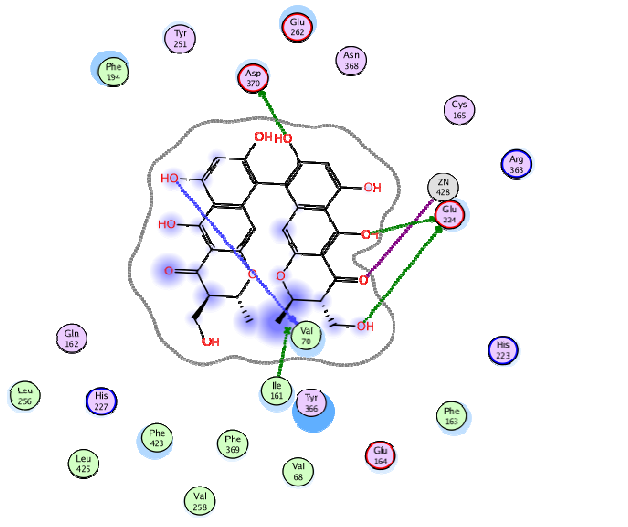

- polar
- acidic
- basic
- greasy
- proximity contour
- sidechain acceptor
- sidechain donor
- backbone acceptor
- backbone donor
- ligand exposure
- solvent residue
- metal complex
- solvent contact
- metal contact
- receptor contact
- nonconserved
- X nonpresent
- inconsistent
- arene-arene
- H arene-H
- + arene-cation

Hypothetical 7H A; Cluster 3

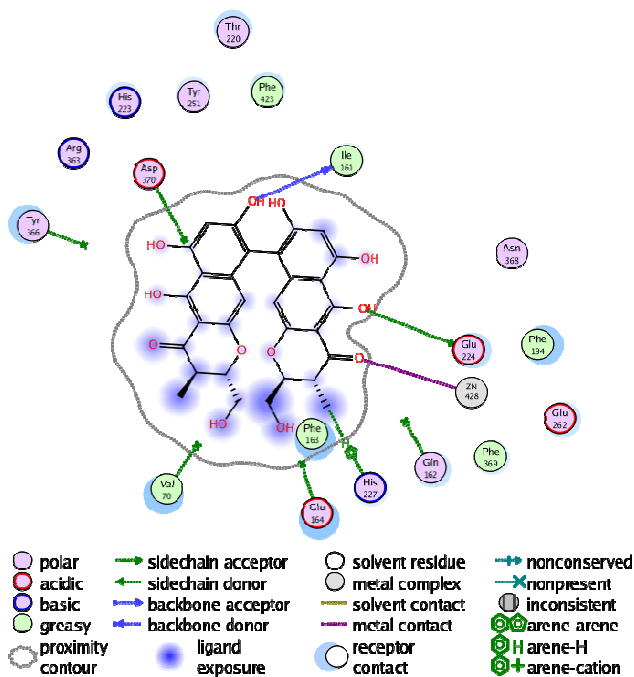

Hypothetical 8H A; Cluster 1

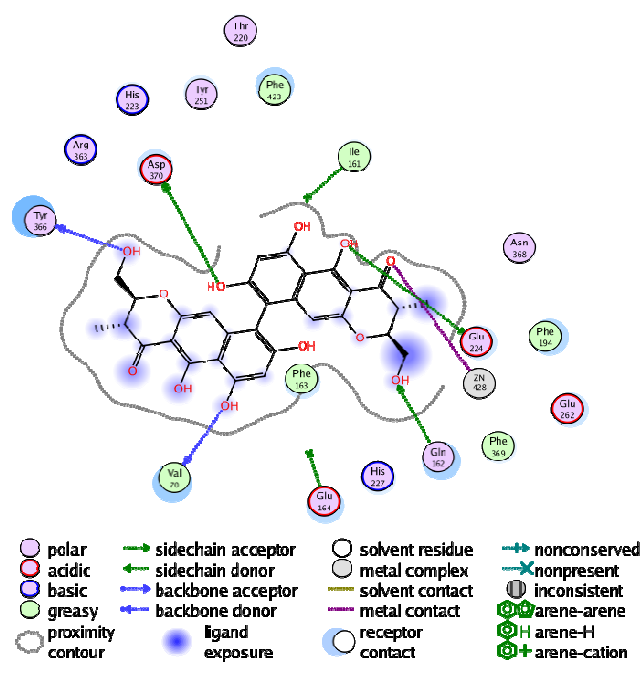

Hypothetical 8H A; Cluster 2

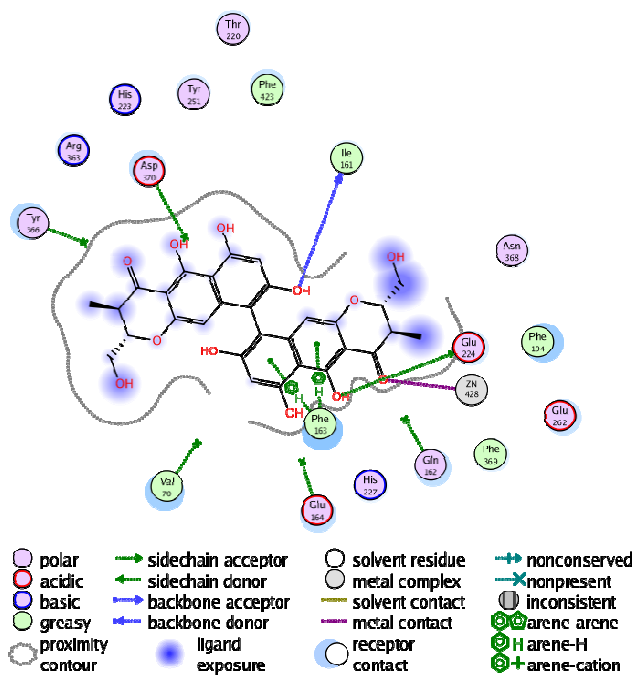

Hypothetical 8H A; Cluster 3

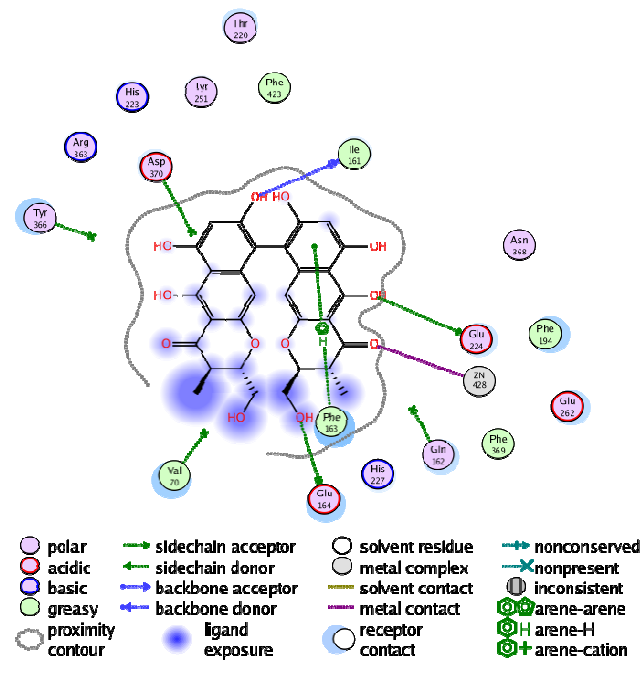

Hypothetical 8H A; Cluster 4

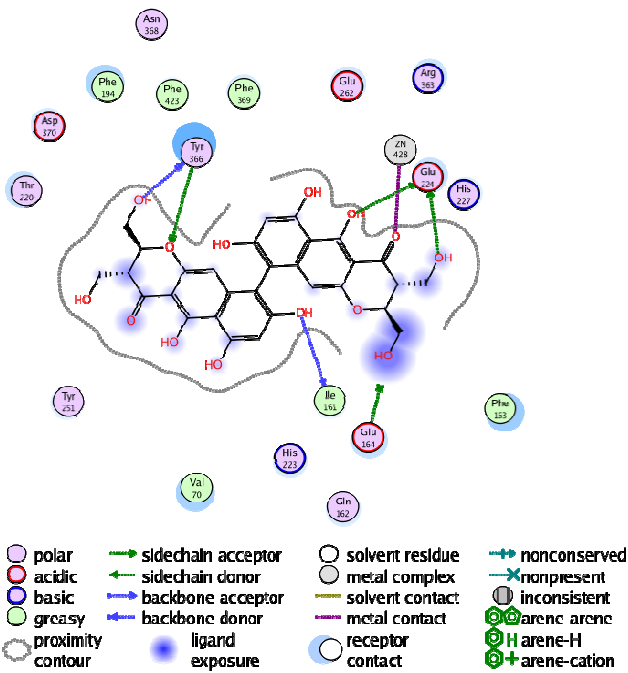

Hypothetical 9H A; Cluster 1

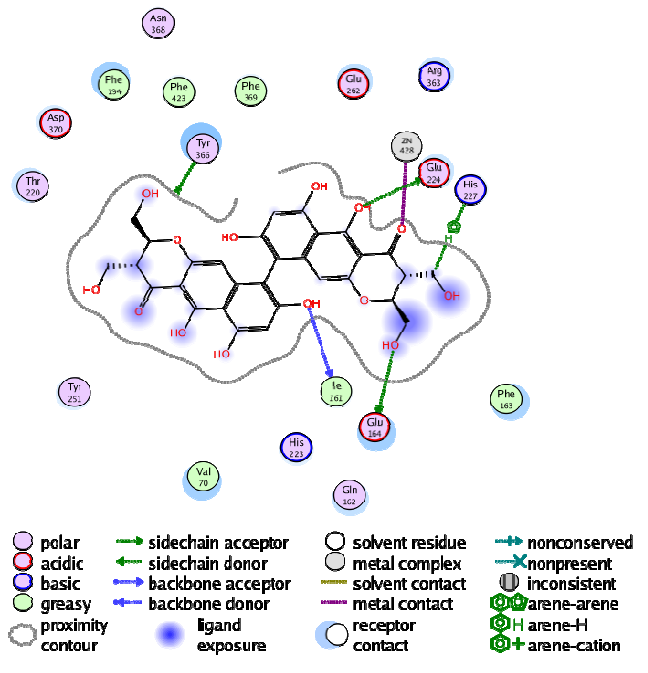

Hypothetical 9H A; Cluster 2

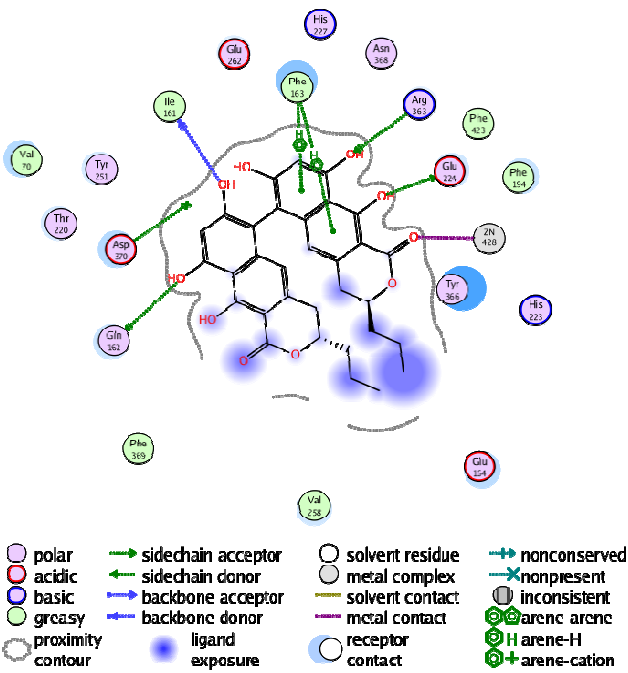

Talaroderxine A; Cluster 1

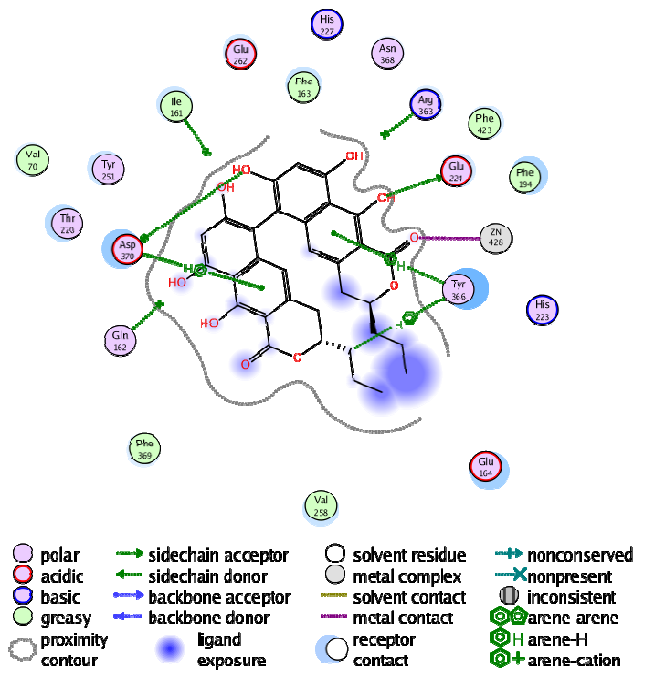

Talaroderxine A; Cluster 2

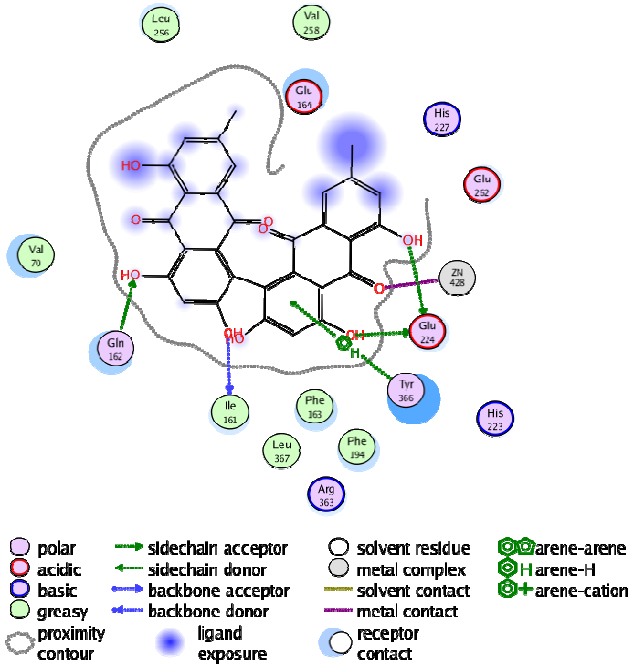

Skyrin; Cluster 1

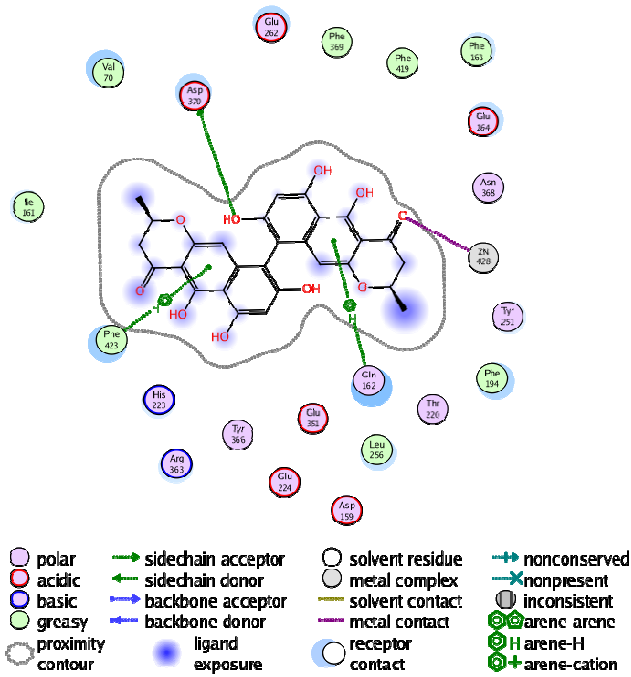

Cephalochromin A; Cluster 1

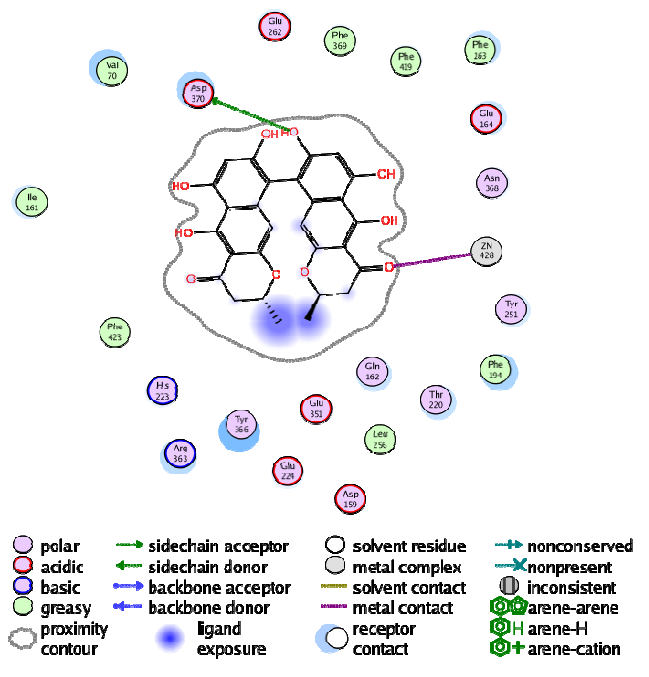

Cephalochromin; Cluster 2

Figure 11S. The structure of the complex of BoNT/A with skyrin from HREX-SRTI simulations.

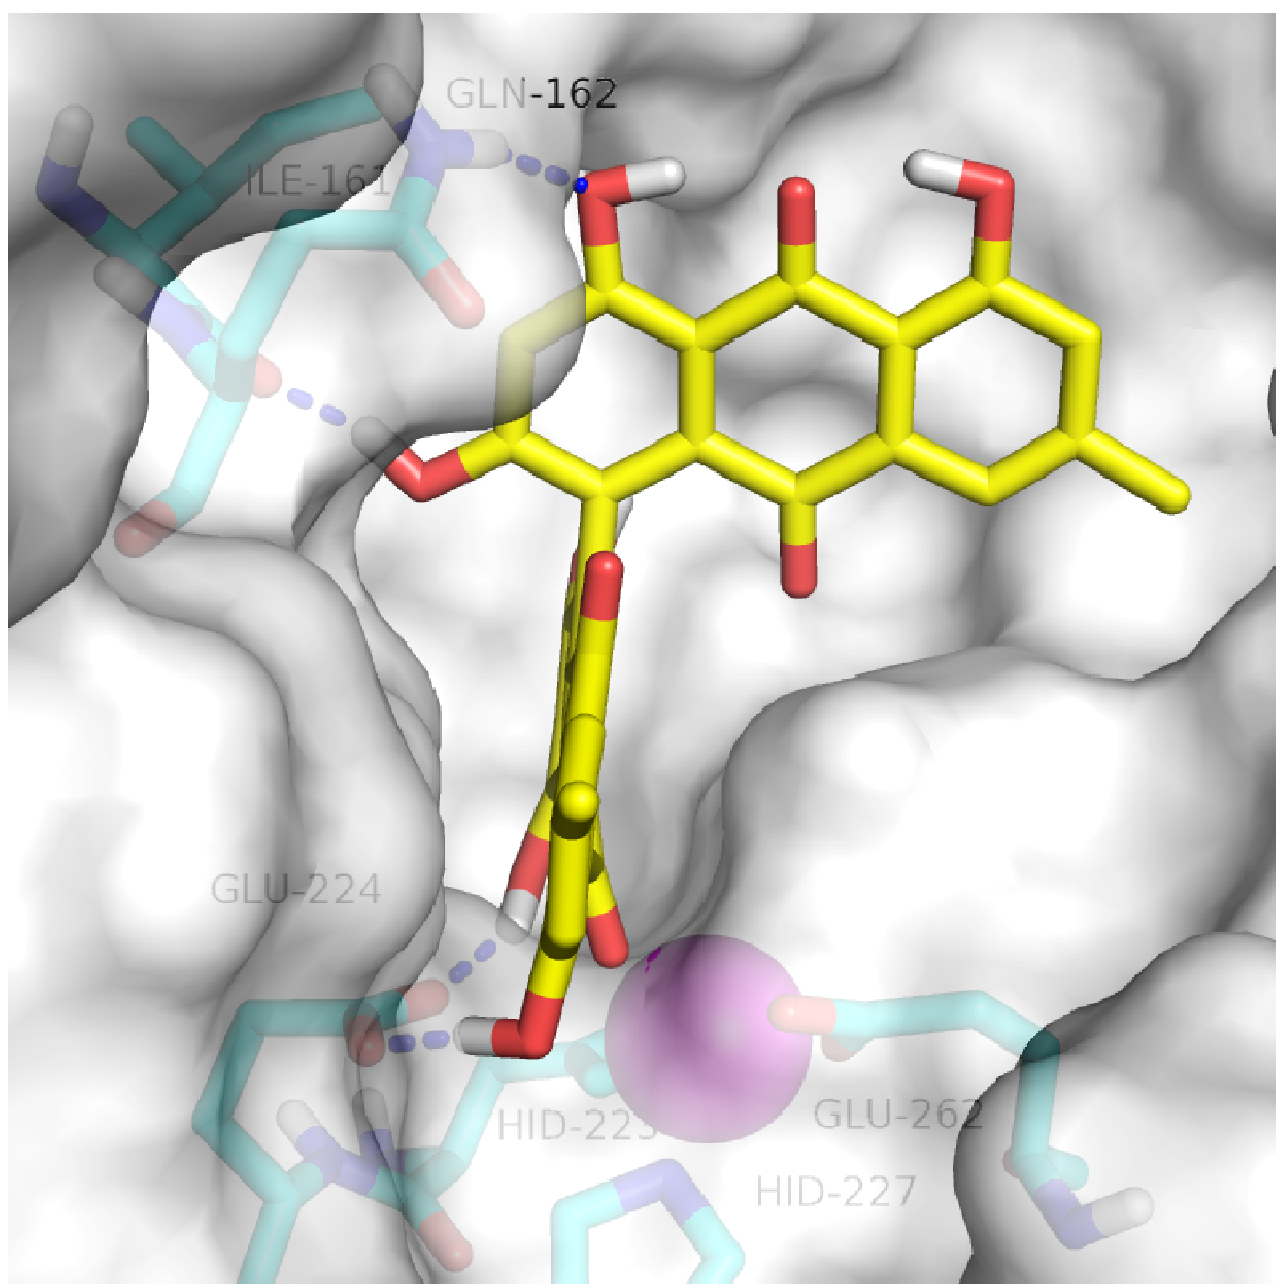

**Table S1. Coordinates and Partial Charges for the Ligands *SRTI Reference Molecule***

lig\_00000001.mol2

@<TRIPOS>MOLECULE

UNK

58 63 1 0 0

SMALL

No Charge or Current Charge

@<TRIPOS>ATOM

|    |     |         |         |         |    |       |           |
|----|-----|---------|---------|---------|----|-------|-----------|
| 1  | C1  | -1.8410 | 0.0800  | -0.0840 | ca | 1 UNK | -0.194605 |
| 2  | C2  | 1.8410  | 0.0800  | -0.0840 | ca | 1 UNK | -0.194605 |
| 3  | C3  | -0.4810 | 4.1010  | -0.0840 | ca | 1 UNK | -0.338605 |
| 4  | C4  | 0.4820  | -0.1710 | -4.0980 | ca | 1 UNK | -0.338605 |
| 5  | C5  | -1.3680 | 1.4210  | -0.0980 | ca | 1 UNK | 0.099595  |
| 6  | C6  | 1.3690  | 0.0100  | -1.4240 | ca | 1 UNK | 0.099595  |
| 7  | C7  | -1.9770 | 2.3590  | 0.7740  | ca | 1 UNK | -0.149405 |
| 8  | C8  | 1.9780  | -0.9190 | -2.3060 | ca | 1 UNK | -0.149405 |
| 9  | C9  | -0.3080 | 1.8160  | -0.9630 | cp | 1 UNK | -0.104705 |
| 10 | C10 | 0.3090  | 0.8490  | -1.8720 | cp | 1 UNK | -0.104705 |
| 11 | C11 | -3.4950 | 0.6000  | 1.6290  | ca | 1 UNK | -0.308005 |
| 12 | C12 | 3.4950  | -1.6640 | -0.4970 | ca | 1 UNK | -0.308005 |
| 13 | C13 | -2.8630 | -0.3220 | 0.7400  | ca | 1 UNK | 0.022095  |
| 14 | C14 | 2.8640  | -0.7190 | 0.3670  | ca | 1 UNK | 0.022095  |
| 15 | C15 | -1.5100 | 3.7080  | 0.7570  | ca | 1 UNK | 0.225895  |
| 16 | C16 | 1.5100  | -0.9860 | -3.6540 | ca | 1 UNK | 0.225895  |
| 17 | C17 | 0.1120  | 3.1470  | -0.9450 | ca | 1 UNK | 0.210595  |
| 18 | C18 | -0.1110 | 0.7480  | -3.1990 | ca | 1 UNK | 0.210595  |
| 19 | C19 | -3.0420 | 1.9250  | 1.6370  | ca | 1 UNK | 0.275695  |
| 20 | C20 | 3.0420  | -1.7530 | -1.8190 | ca | 1 UNK | 0.275695  |
| 21 | C21 | -4.5810 | 0.1460  | 2.5020  | c  | 1 UNK | 0.602295  |
| 22 | C22 | 4.5810  | -2.5070 | 0.0100  | c  | 1 UNK | 0.602295  |
| 23 | C23 | -3.3140 | -1.7410 | 0.6690  | c3 | 1 UNK | -0.047805 |
| 24 | C24 | 3.3140  | -0.5600 | 1.7800  | c3 | 1 UNK | -0.047805 |
| 25 | C25 | -5.0510 | -1.2770 | 2.3750  | c3 | 1 UNK | -0.171805 |
| 26 | C26 | 5.0500  | -2.2920 | 1.4230  | c3 | 1 UNK | -0.171805 |
| 27 | C27 | -3.9420 | -2.2130 | 1.9610  | c3 | 1 UNK | -0.072805 |
| 28 | C28 | 3.9420  | -1.8200 | 2.3310  | c3 | 1 UNK | -0.072805 |
| 29 | O1  | -5.1380 | 0.8930  | 3.3280  | o  | 1 UNK | -0.593305 |
| 30 | O2  | 5.1380  | -3.3780 | -0.6840 | o  | 1 UNK | -0.593305 |
| 31 | O3  | -2.1220 | 4.5860  | 1.6110  | oh | 1 UNK | -0.457205 |
| 32 | O4  | 2.1230  | -1.8930 | -4.4760 | oh | 1 UNK | -0.457205 |
| 33 | O5  | 1.1340  | 3.5120  | -1.7860 | oh | 1 UNK | -0.479505 |
| 34 | O6  | -1.1330 | 1.5650  | -3.6150 | oh | 1 UNK | -0.479505 |
| 35 | O7  | -3.5350 | 2.9150  | 2.4270  | oh | 1 UNK | -0.477105 |
| 36 | O8  | 3.5350  | -2.6040 | -2.7580 | oh | 1 UNK | -0.477105 |
| 37 | H1  | -1.3590 | -0.6430 | -0.7620 | ha | 1 UNK | 0.149095  |
| 38 | H2  | 1.3600  | 0.8010  | 0.5950  | ha | 1 UNK | 0.149095  |
| 39 | H3  | -0.1280 | 5.1410  | -0.0940 | ha | 1 UNK | 0.138695  |
| 40 | H4  | 0.1280  | -0.2250 | -5.1360 | ha | 1 UNK | 0.138695  |
| 41 | H5  | -4.0600 | -1.8310 | -0.1680 | hc | 1 UNK | 0.059545  |
| 42 | H6  | -2.4450 | -2.4040 | 0.4120  | hc | 1 UNK | 0.059545  |
| 43 | H7  | 4.0620  | 0.2810  | 1.8180  | hc | 1 UNK | 0.059545  |
| 44 | H8  | 2.4460  | -0.2610 | 2.4260  | hc | 1 UNK | 0.059545  |
| 45 | H9  | -5.4930 | -1.6060 | 3.3520  | hc | 1 UNK | 0.074020  |
| 46 | H10 | -5.8740 | -1.2920 | 1.6100  | hc | 1 UNK | 0.074020  |
| 47 | H11 | 5.4920  | -3.2470 | 1.8120  | hc | 1 UNK | 0.074020  |
| 48 | H12 | 5.8740  | -1.5280 | 1.3910  | hc | 1 UNK | 0.074020  |
| 49 | H13 | -4.3520 | -3.2470 | 1.8250  | hc | 1 UNK | 0.051545  |
| 50 | H14 | -3.1640 | -2.2630 | 2.7670  | hc | 1 UNK | 0.051545  |
| 51 | H15 | 4.3520  | -1.6200 | 3.3550  | hc | 1 UNK | 0.051545  |
| 52 | H16 | 3.1630  | -2.6210 | 2.4310  | hc | 1 UNK | 0.051545  |
| 53 | H17 | -1.7190 | 5.4600  | 1.4870  | ho | 1 UNK | 0.417595  |
| 54 | H18 | 1.7190  | -1.8240 | -5.3560 | ho | 1 UNK | 0.417595  |
| 55 | H19 | 1.2920  | 4.4610  | -1.6740 | ho | 1 UNK | 0.419595  |
| 56 | H20 | -1.2910 | 1.3940  | -4.5560 | ho | 1 UNK | 0.419595  |
| 57 | H21 | -4.2550 | 2.5880  | 2.9940  | ho | 1 UNK | 0.463495  |



58 H22 4.2550 -3.1500 -2.3960 ho 1 UNK 0.463495  
@<TRIPOS>BOND

|    |    |    |    |
|----|----|----|----|
| 1  | 1  | 5  | ar |
| 2  | 1  | 13 | ar |
| 3  | 2  | 6  | ar |
| 4  | 2  | 14 | ar |
| 5  | 3  | 15 | ar |
| 6  | 3  | 17 | ar |
| 7  | 4  | 16 | ar |
| 8  | 4  | 18 | ar |
| 9  | 5  | 7  | ar |
| 10 | 5  | 9  | ar |
| 11 | 6  | 8  | ar |
| 12 | 6  | 10 | ar |
| 13 | 7  | 15 | ar |
| 14 | 7  | 19 | ar |
| 15 | 8  | 16 | ar |
| 16 | 8  | 20 | ar |
| 17 | 9  | 10 | l  |
| 18 | 9  | 17 | ar |
| 19 | 10 | 18 | ar |
| 20 | 11 | 13 | ar |
| 21 | 11 | 19 | ar |
| 22 | 11 | 21 | l  |
| 23 | 12 | 14 | ar |
| 24 | 12 | 20 | ar |
| 25 | 12 | 22 | l  |
| 26 | 13 | 23 | l  |
| 27 | 14 | 24 | l  |
| 28 | 15 | 31 | l  |
| 29 | 16 | 32 | l  |
| 30 | 17 | 33 | l  |
| 31 | 18 | 34 | l  |
| 32 | 19 | 35 | l  |
| 33 | 20 | 36 | l  |
| 34 | 21 | 25 | l  |
| 35 | 21 | 29 | 2  |
| 36 | 22 | 26 | l  |
| 37 | 22 | 30 | 2  |
| 38 | 23 | 27 | l  |
| 39 | 24 | 28 | l  |
| 40 | 25 | 27 | l  |
| 41 | 26 | 28 | l  |
| 42 | 1  | 37 | l  |
| 43 | 2  | 38 | l  |
| 44 | 3  | 39 | l  |
| 45 | 4  | 40 | l  |
| 46 | 23 | 41 | l  |
| 47 | 23 | 42 | l  |
| 48 | 24 | 43 | l  |
| 49 | 24 | 44 | l  |
| 50 | 25 | 45 | l  |
| 51 | 25 | 46 | l  |
| 52 | 26 | 47 | l  |
| 53 | 26 | 48 | l  |
| 54 | 27 | 49 | l  |
| 55 | 27 | 50 | l  |
| 56 | 28 | 51 | l  |
| 57 | 28 | 52 | l  |
| 58 | 31 | 53 | l  |
| 59 | 32 | 54 | l  |
| 60 | 33 | 55 | l  |
| 61 | 34 | 56 | l  |
| 62 | 35 | 57 | l  |
| 63 | 36 | 58 | l  |

@<TRIPOS>SUBSTRUCTURE

1 UNK

1 TEMP

0 \*\*\*\*\*

0 ROOT

**Chaetochromin A (1)**

lig\_00000002.mol2

@&lt;TRIPOS&gt;MOLECULE

UNK

66 71 1 0 0

SMALL

No Charge or Current Charge

@&lt;TRIPOS&gt;ATOM

|    |     |         |         |         |    |   |     |           |
|----|-----|---------|---------|---------|----|---|-----|-----------|
| 1  | C1  | -1.8760 | 0.4500  | -0.4970 | ca | 1 | UNK | -0.224000 |
| 2  | C2  | 1.8740  | 0.4500  | -0.4970 | ca | 1 | UNK | -0.224000 |
| 3  | C3  | -0.4110 | 4.4350  | -0.4970 | ca | 1 | UNK | -0.344100 |
| 4  | C4  | 0.4100  | 0.0640  | -4.4630 | ca | 1 | UNK | -0.344100 |
| 5  | C5  | -1.3810 | 1.7800  | -0.5130 | ca | 1 | UNK | 0.123900  |
| 6  | C6  | 1.3790  | 0.3370  | -1.8220 | ca | 1 | UNK | 0.123900  |
| 7  | C7  | -1.9720 | 2.7430  | 0.3480  | ca | 1 | UNK | -0.168900 |
| 8  | C8  | 1.9710  | -0.6130 | -2.6970 | ca | 1 | UNK | -0.168900 |
| 9  | C9  | -0.3000 | 2.1420  | -1.3680 | cp | 1 | UNK | -0.109200 |
| 10 | C10 | 0.2980  | 1.1530  | -2.2660 | cp | 1 | UNK | -0.109200 |
| 11 | C11 | -3.5700 | 1.0500  | 1.1860  | ca | 1 | UNK | -0.364000 |
| 12 | C12 | 3.5690  | -1.2820 | -0.9310 | ca | 1 | UNK | -0.364000 |
| 13 | C13 | -2.9300 | 0.1070  | 0.3240  | ca | 1 | UNK | 0.210600  |
| 14 | C14 | 2.9290  | -0.3330 | -0.0760 | ca | 1 | UNK | 0.210600  |
| 15 | C15 | -1.4580 | 4.0760  | 0.3350  | ca | 1 | UNK | 0.232200  |
| 16 | C16 | 1.4580  | -0.7290 | -4.0250 | ca | 1 | UNK | 0.232200  |
| 17 | C17 | 0.1590  | 3.4600  | -1.3510 | ca | 1 | UNK | 0.217700  |
| 18 | C18 | -0.1610 | 1.0080  | -3.5750 | ca | 1 | UNK | 0.217700  |
| 19 | C19 | -3.0650 | 2.3570  | 1.1950  | ca | 1 | UNK | 0.298600  |
| 20 | C20 | 3.0650  | -1.4170 | -2.2310 | ca | 1 | UNK | 0.298600  |
| 21 | C21 | -4.7210 | 0.6340  | 1.9800  | c  | 1 | UNK | 0.606200  |
| 22 | C22 | 4.7220  | -2.0300 | -0.4400 | c  | 1 | UNK | 0.606200  |
| 23 | C23 | -5.2220 | -0.7740 | 1.7440  | c3 | 1 | UNK | -0.184600 |
| 24 | C24 | 5.2230  | -1.6580 | 0.9390  | c3 | 1 | UNK | -0.184600 |
| 25 | C25 | -4.0610 | -1.6970 | 1.3850  | c3 | 1 | UNK | 0.149100  |
| 26 | C26 | 4.0610  | -1.2130 | 1.8220  | c3 | 1 | UNK | 0.149100  |
| 27 | C27 | -5.9840 | -1.2990 | 2.9400  | c3 | 1 | UNK | -0.086000 |
| 28 | C28 | 5.9860  | -2.7970 | 1.5770  | c3 | 1 | UNK | -0.086000 |
| 29 | C29 | -4.5200 | -3.0900 | 0.9970  | c3 | 1 | UNK | -0.095300 |
| 30 | C30 | 4.5200  | -0.6910 | 3.1710  | c3 | 1 | UNK | -0.095300 |
| 31 | O1  | -5.3040 | 1.3870  | 2.7800  | o  | 1 | UNK | -0.582500 |
| 32 | O2  | 5.3050  | -2.8990 | -1.1120 | o  | 1 | UNK | -0.582500 |
| 33 | O3  | -3.3560 | -1.2010 | 0.2300  | os | 1 | UNK | -0.325400 |
| 34 | O4  | 3.3550  | -0.1120 | 1.2170  | os | 1 | UNK | -0.325400 |
| 35 | O5  | -2.0510 | 4.9740  | 1.1820  | oh | 1 | UNK | -0.460000 |
| 36 | O6  | 2.0500  | -1.6580 | -4.8370 | oh | 1 | UNK | -0.460000 |
| 37 | O7  | 1.1930  | 3.7920  | -2.1890 | oh | 1 | UNK | -0.478400 |
| 38 | O8  | -1.1950 | 1.8100  | -3.9870 | oh | 1 | UNK | -0.478400 |
| 39 | O9  | -3.5470 | 3.3600  | 1.9720  | oh | 1 | UNK | -0.470800 |
| 40 | O10 | 3.5470  | -2.2880 | -3.1540 | oh | 1 | UNK | -0.470800 |
| 41 | H1  | -1.4150 | -0.3070 | -1.1480 | ha | 1 | UNK | 0.164800  |
| 42 | H2  | 1.4130  | 1.1710  | 0.1940  | ha | 1 | UNK | 0.164800  |
| 43 | H3  | -0.0220 | 5.4620  | -0.5040 | ha | 1 | UNK | 0.138800  |
| 44 | H4  | 0.0210  | -0.0290 | -5.4860 | ha | 1 | UNK | 0.138800  |
| 45 | H5  | -5.9200 | -0.7140 | 0.8580  | hc | 1 | UNK | 0.090800  |
| 46 | H6  | 5.9200  | -0.7820 | 0.7920  | hc | 1 | UNK | 0.090800  |
| 47 | H7  | -3.3320 | -1.7460 | 2.2420  | h1 | 1 | UNK | 0.057200  |
| 48 | H8  | 3.3330  | -2.0620 | 1.9540  | h1 | 1 | UNK | 0.057200  |
| 49 | H9  | -6.5200 | -2.2420 | 2.6730  | hc | 1 | UNK | 0.048367  |
| 50 | H10 | -6.7320 | -0.5400 | 3.2780  | hc | 1 | UNK | 0.048367  |
| 51 | H11 | -5.2900 | -1.5090 | 3.7890  | hc | 1 | UNK | 0.048367  |
| 52 | H12 | 6.5220  | -2.4390 | 2.4890  | hc | 1 | UNK | 0.048367  |
| 53 | H13 | 6.7350  | -3.2060 | 0.8540  | hc | 1 | UNK | 0.048367  |
| 54 | H14 | 5.2930  | -3.6220 | 1.8680  | hc | 1 | UNK | 0.048367  |
| 55 | H15 | -3.6670 | -3.6600 | 0.5560  | hc | 1 | UNK | 0.052367  |
| 56 | H16 | -5.3400 | -3.0380 | 0.2410  | hc | 1 | UNK | 0.052367  |
| 57 | H17 | -4.8880 | -3.6230 | 1.9050  | hc | 1 | UNK | 0.052367  |

|    |     |         |         |         |    |   |     |          |
|----|-----|---------|---------|---------|----|---|-----|----------|
| 58 | H18 | 3.6660  | -0.1980 | 3.6960  | hc | 1 | UNK | 0.052367 |
| 59 | H19 | 5.3390  | 0.0570  | 3.0460  | hc | 1 | UNK | 0.052367 |
| 60 | H20 | 4.8890  | -1.5430 | 3.7890  | hc | 1 | UNK | 0.052367 |
| 61 | H21 | -1.6140 | 5.8320  | 1.0670  | ho | 1 | UNK | 0.418600 |
| 62 | H22 | 1.6140  | -1.6270 | -5.7020 | ho | 1 | UNK | 0.418600 |
| 63 | H23 | 1.3980  | 4.7300  | -2.0590 | ho | 1 | UNK | 0.419900 |
| 64 | H24 | -1.3990 | 1.5890  | -4.9090 | ho | 1 | UNK | 0.419900 |
| 65 | H25 | -4.2860 | 3.0490  | 2.5250  | ho | 1 | UNK | 0.462600 |
| 66 | H26 | 4.2860  | -2.8070 | -2.7910 | ho | 1 | UNK | 0.462600 |

@<TRIPOS>BOND

|    |    |    |    |
|----|----|----|----|
| 1  | 1  | 5  | ar |
| 2  | 1  | 13 | ar |
| 3  | 2  | 6  | ar |
| 4  | 2  | 14 | ar |
| 5  | 3  | 15 | ar |
| 6  | 3  | 17 | ar |
| 7  | 4  | 16 | ar |
| 8  | 4  | 18 | ar |
| 9  | 5  | 7  | ar |
| 10 | 5  | 9  | ar |
| 11 | 6  | 8  | ar |
| 12 | 6  | 10 | ar |
| 13 | 7  | 15 | ar |
| 14 | 7  | 19 | ar |
| 15 | 8  | 16 | ar |
| 16 | 8  | 20 | ar |
| 17 | 9  | 10 | l  |
| 18 | 9  | 17 | ar |
| 19 | 10 | 18 | ar |
| 20 | 11 | 13 | ar |
| 21 | 11 | 19 | ar |
| 22 | 11 | 21 | l  |
| 23 | 12 | 14 | ar |
| 24 | 12 | 20 | ar |
| 25 | 12 | 22 | l  |
| 26 | 13 | 33 | l  |
| 27 | 14 | 34 | l  |
| 28 | 15 | 35 | l  |
| 29 | 16 | 36 | l  |
| 30 | 17 | 37 | l  |
| 31 | 18 | 38 | l  |
| 32 | 19 | 39 | l  |
| 33 | 20 | 40 | l  |
| 34 | 21 | 23 | l  |
| 35 | 21 | 31 | 2  |
| 36 | 22 | 24 | l  |
| 37 | 22 | 32 | 2  |
| 38 | 23 | 25 | l  |
| 39 | 23 | 27 | l  |
| 40 | 24 | 26 | l  |
| 41 | 24 | 28 | l  |
| 42 | 25 | 29 | l  |
| 43 | 25 | 33 | l  |
| 44 | 26 | 30 | l  |
| 45 | 26 | 34 | l  |
| 46 | 1  | 41 | l  |
| 47 | 2  | 42 | l  |
| 48 | 3  | 43 | l  |
| 49 | 4  | 44 | l  |
| 50 | 23 | 45 | l  |
| 51 | 24 | 46 | l  |
| 52 | 25 | 47 | l  |
| 53 | 26 | 48 | l  |
| 54 | 27 | 49 | l  |
| 55 | 27 | 50 | l  |
| 56 | 27 | 51 | l  |
| 57 | 28 | 52 | l  |
| 58 | 28 | 53 | l  |

|    |    |    |   |
|----|----|----|---|
| 59 | 28 | 54 | 1 |
| 60 | 29 | 55 | 1 |
| 61 | 29 | 56 | 1 |
| 62 | 29 | 57 | 1 |
| 63 | 30 | 58 | 1 |
| 64 | 30 | 59 | 1 |
| 65 | 30 | 60 | 1 |
| 66 | 35 | 61 | 1 |
| 67 | 36 | 62 | 1 |
| 68 | 37 | 63 | 1 |
| 69 | 38 | 64 | 1 |
| 70 | 39 | 65 | 1 |
| 71 | 40 | 66 | 1 |

@<TRIPOS>SUBSTRUCTURE

1 UNK 1 TEMP 0 \*\*\*\* \* 0 ROOT

**Hypothetical Compound 7H**

lig\_00000003.mol2

@<TRIPOS>MOLECULE

UNK

68 73 1 0 0

SMALL

No Charge or Current Charge

@<TRIPOS>ATOM

|    |     |         |         |         |    |   |     |           |
|----|-----|---------|---------|---------|----|---|-----|-----------|
| 1  | C1  | -1.8570 | 0.4990  | -0.5570 | ca | 1 | UNK | -0.224209 |
| 2  | C2  | 1.8810  | 0.4990  | -0.5570 | ca | 1 | UNK | -0.224209 |
| 3  | C3  | -0.4070 | 4.4900  | -0.5570 | ca | 1 | UNK | -0.343940 |
| 4  | C4  | 0.4280  | 0.1330  | -4.5310 | ca | 1 | UNK | -0.343940 |
| 5  | C5  | -1.3670 | 1.8320  | -0.5730 | ca | 1 | UNK | 0.125997  |
| 6  | C6  | 1.3900  | 0.3920  | -1.8850 | ca | 1 | UNK | 0.125997  |
| 7  | C7  | -1.9610 | 2.7930  | 0.2890  | ca | 1 | UNK | -0.170414 |
| 8  | C8  | 1.9820  | -0.5560 | -2.7630 | ca | 1 | UNK | -0.170414 |
| 9  | C9  | -0.2880 | 2.1980  | -1.4290 | cp | 1 | UNK | -0.110345 |
| 10 | C10 | 0.3120  | 1.2110  | -2.3280 | cp | 1 | UNK | -0.110345 |
| 11 | C11 | -3.5500 | 1.0930  | 1.1280  | ca | 1 | UNK | -0.365860 |
| 12 | C12 | 3.5720  | -1.2330 | -0.9950 | ca | 1 | UNK | -0.365860 |
| 13 | C13 | -2.9090 | 0.1520  | 0.2640  | ca | 1 | UNK | 0.212805  |
| 14 | C14 | 2.9340  | -0.2860 | -0.1350 | ca | 1 | UNK | 0.212805  |
| 15 | C15 | -1.4530 | 4.1280  | 0.2750  | ca | 1 | UNK | 0.233384  |
| 16 | C16 | 1.4730  | -0.6640 | -4.0940 | ca | 1 | UNK | 0.233384  |
| 17 | C17 | 0.1660  | 3.5170  | -1.4110 | ca | 1 | UNK | 0.219882  |
| 18 | C18 | -0.1430 | 1.0730  | -3.6400 | ca | 1 | UNK | 0.219882  |
| 19 | C19 | -3.0520 | 2.4030  | 1.1360  | ca | 1 | UNK | 0.302207  |
| 20 | C20 | 3.0690  | -1.3670 | -2.2950 | ca | 1 | UNK | 0.302207  |
| 21 | C21 | -4.6930 | 0.6680  | 1.9230  | c  | 1 | UNK | 0.610925  |
| 22 | C22 | 4.7100  | -1.9920 | -0.4970 | c  | 1 | UNK | 0.610925  |
| 23 | C23 | -5.1850 | -0.7440 | 1.7020  | c3 | 1 | UNK | -0.230218 |
| 24 | C24 | 5.2690  | -1.5410 | 0.8340  | c3 | 1 | UNK | -0.230218 |
| 25 | C25 | -4.0290 | -1.6630 | 1.3260  | c3 | 1 | UNK | 0.154626  |
| 26 | C26 | 4.1240  | -1.1350 | 1.7560  | c3 | 1 | UNK | 0.154626  |
| 27 | C27 | -4.4830 | -3.0540 | 0.9230  | c3 | 1 | UNK | -0.100194 |
| 28 | C28 | 4.6000  | -0.5720 | 3.0810  | c3 | 1 | UNK | -0.100194 |
| 29 | C29 | -5.9200 | -1.2700 | 2.9370  | c3 | 1 | UNK | 0.148612  |
| 30 | C30 | 6.1550  | -2.6180 | 1.4580  | c3 | 1 | UNK | 0.148612  |
| 31 | O1  | -5.2810 | 1.4130  | 2.7300  | o  | 1 | UNK | -0.599161 |
| 32 | O2  | 5.2260  | -2.9460 | -1.1080 | o  | 1 | UNK | -0.599161 |
| 33 | O3  | -3.3330 | -1.1570 | 0.1690  | os | 1 | UNK | -0.324790 |
| 34 | O4  | 3.3490  | -0.0730 | 1.1610  | os | 1 | UNK | -0.324790 |
| 35 | O5  | -2.0490 | 5.0220  | 1.1220  | oh | 1 | UNK | -0.460210 |
| 36 | O6  | 2.0690  | -1.5900 | -4.9070 | oh | 1 | UNK | -0.460210 |
| 37 | O7  | 1.2000  | 3.8530  | -2.2500 | oh | 1 | UNK | -0.477929 |
| 38 | O8  | -1.1750 | 1.8790  | -4.0510 | oh | 1 | UNK | -0.477929 |
| 39 | O9  | -3.5380 | 3.4020  | 1.9140  | oh | 1 | UNK | -0.468310 |
| 40 | O10 | 3.5530  | -2.2400 | -3.2150 | oh | 1 | UNK | -0.468310 |
| 41 | O11 | -7.1830 | -0.6640 | 3.0880  | oh | 1 | UNK | -0.601217 |

|    |     |         |         |         |    |   |     |           |
|----|-----|---------|---------|---------|----|---|-----|-----------|
| 42 | O12 | 5.4580  | -3.8200 | 1.7020  | oh | 1 | UNK | -0.601217 |
| 43 | H1  | -1.3940 | -0.2560 | -1.2100 | ha | 1 | UNK | 0.165456  |
| 44 | H2  | 1.4170  | 1.2170  | 0.1350  | ha | 1 | UNK | 0.165456  |
| 45 | H3  | -0.0220 | 5.5190  | -0.5650 | ha | 1 | UNK | 0.139701  |
| 46 | H4  | 0.0430  | 0.0460  | -5.5550 | ha | 1 | UNK | 0.139701  |
| 47 | H5  | -5.9170 | -0.6980 | 0.8440  | hc | 1 | UNK | 0.101850  |
| 48 | H6  | 5.9100  | -0.6360 | 0.6310  | hc | 1 | UNK | 0.101850  |
| 49 | H7  | -3.2920 | -1.7180 | 2.1760  | h1 | 1 | UNK | 0.066687  |
| 50 | H8  | 3.4430  | -2.0170 | 1.9220  | h1 | 1 | UNK | 0.066687  |
| 51 | H9  | -3.6760 | -3.5570 | 0.3350  | hc | 1 | UNK | 0.054510  |
| 52 | H10 | -5.4020 | -3.0040 | 0.2930  | hc | 1 | UNK | 0.054510  |
| 53 | H11 | -4.6950 | -3.6580 | 1.8370  | hc | 1 | UNK | 0.054510  |
| 54 | H12 | 3.7620  | -0.0300 | 3.5830  | hc | 1 | UNK | 0.054510  |
| 55 | H13 | 5.4430  | 0.1430  | 2.9290  | hc | 1 | UNK | 0.054510  |
| 56 | H14 | 4.9370  | -1.4090 | 3.7370  | hc | 1 | UNK | 0.054510  |
| 57 | H15 | -5.2910 | -1.1090 | 3.8520  | h1 | 1 | UNK | 0.054479  |
| 58 | H16 | -6.1450 | -2.3650 | 2.8160  | h1 | 1 | UNK | 0.054479  |
| 59 | H17 | 6.5180  | -2.2840 | 2.4680  | h1 | 1 | UNK | 0.054479  |
| 60 | H18 | 7.0320  | -2.8040 | 0.7810  | h1 | 1 | UNK | 0.054479  |
| 61 | H19 | -1.6170 | 5.8830  | 1.0070  | ho | 1 | UNK | 0.419798  |
| 62 | H20 | 1.6330  | -1.5580 | -5.7730 | ho | 1 | UNK | 0.419798  |
| 63 | H21 | 1.3980  | 4.7930  | -2.1230 | ho | 1 | UNK | 0.420858  |
| 64 | H22 | -1.3790 | 1.6620  | -4.9730 | ho | 1 | UNK | 0.420858  |
| 65 | H23 | -4.2790 | 3.0890  | 2.4630  | ho | 1 | UNK | 0.461905  |
| 66 | H24 | 4.2800  | -2.7690 | -2.8420 | ho | 1 | UNK | 0.461905  |
| 67 | H25 | -7.0370 | 0.2730  | 3.2800  | ho | 1 | UNK | 0.419618  |
| 68 | H26 | 5.2630  | -4.2150 | 0.8410  | ho | 1 | UNK | 0.419618  |

@<TRIPOS>BOND

|    |    |    |    |
|----|----|----|----|
| 1  | 1  | 5  | ar |
| 2  | 1  | 13 | ar |
| 3  | 2  | 6  | ar |
| 4  | 2  | 14 | ar |
| 5  | 3  | 15 | ar |
| 6  | 3  | 17 | ar |
| 7  | 4  | 16 | ar |
| 8  | 4  | 18 | ar |
| 9  | 5  | 7  | ar |
| 10 | 5  | 9  | ar |
| 11 | 6  | 8  | ar |
| 12 | 6  | 10 | ar |
| 13 | 7  | 15 | ar |
| 14 | 7  | 19 | ar |
| 15 | 8  | 16 | ar |
| 16 | 8  | 20 | ar |
| 17 | 9  | 10 | l  |
| 18 | 9  | 17 | ar |
| 19 | 10 | 18 | ar |
| 20 | 11 | 13 | ar |
| 21 | 11 | 19 | ar |
| 22 | 11 | 21 | l  |
| 23 | 12 | 14 | ar |
| 24 | 12 | 20 | ar |
| 25 | 12 | 22 | l  |
| 26 | 13 | 33 | l  |
| 27 | 14 | 34 | l  |
| 28 | 15 | 35 | l  |
| 29 | 16 | 36 | l  |
| 30 | 17 | 37 | l  |
| 31 | 18 | 38 | l  |
| 32 | 19 | 39 | l  |
| 33 | 20 | 40 | l  |
| 34 | 21 | 23 | l  |
| 35 | 21 | 31 | 2  |
| 36 | 22 | 24 | l  |
| 37 | 22 | 32 | 2  |
| 38 | 23 | 25 | l  |
| 39 | 23 | 29 | l  |
| 40 | 24 | 26 | l  |

|    |    |    |   |
|----|----|----|---|
| 41 | 24 | 30 | 1 |
| 42 | 25 | 27 | 1 |
| 43 | 25 | 33 | 1 |
| 44 | 26 | 28 | 1 |
| 45 | 26 | 34 | 1 |
| 46 | 29 | 41 | 1 |
| 47 | 30 | 42 | 1 |
| 48 | 1  | 43 | 1 |
| 49 | 2  | 44 | 1 |
| 50 | 3  | 45 | 1 |
| 51 | 4  | 46 | 1 |
| 52 | 23 | 47 | 1 |
| 53 | 24 | 48 | 1 |
| 54 | 25 | 49 | 1 |
| 55 | 26 | 50 | 1 |
| 56 | 27 | 51 | 1 |
| 57 | 27 | 52 | 1 |
| 58 | 27 | 53 | 1 |
| 59 | 28 | 54 | 1 |
| 60 | 28 | 55 | 1 |
| 61 | 28 | 56 | 1 |
| 62 | 29 | 57 | 1 |
| 63 | 29 | 58 | 1 |
| 64 | 30 | 59 | 1 |
| 65 | 30 | 60 | 1 |
| 66 | 35 | 61 | 1 |
| 67 | 36 | 62 | 1 |
| 68 | 37 | 63 | 1 |
| 69 | 38 | 64 | 1 |
| 70 | 39 | 65 | 1 |
| 71 | 40 | 66 | 1 |
| 72 | 41 | 67 | 1 |
| 73 | 42 | 68 | 1 |

@<TRIPOS>SUBSTRUCTURE

1 UNK 1 TEMP 0 \*\*\*\*\* 0 ROOT

**Hypothetical Compound 8H**

lig\_00000004.mol2

@<TRIPOS>MOLECULE

UNK

68 73 1 0 0

SMALL

No Charge or Current Charge

@<TRIPOS>ATOM

|    |     |         |         |         |    |   |     |           |
|----|-----|---------|---------|---------|----|---|-----|-----------|
| 1  | C1  | -1.8820 | 0.5410  | -0.5810 | ca | 1 | UNK | -0.221852 |
| 2  | C2  | 1.8420  | 0.5410  | -0.5810 | ca | 1 | UNK | -0.221852 |
| 3  | C3  | -0.4480 | 4.5380  | -0.5810 | ca | 1 | UNK | -0.343649 |
| 4  | C4  | 0.4100  | 0.1970  | -4.5630 | ca | 1 | UNK | -0.343649 |
| 5  | C5  | -1.3970 | 1.8760  | -0.5970 | ca | 1 | UNK | 0.122702  |
| 6  | C6  | 1.3580  | 0.4430  | -1.9120 | ca | 1 | UNK | 0.122702  |
| 7  | C7  | -1.9940 | 2.8330  | 0.2670  | ca | 1 | UNK | -0.168049 |
| 8  | C8  | 1.9570  | -0.4990 | -2.7920 | ca | 1 | UNK | -0.168049 |
| 9  | C9  | -0.3210 | 2.2470  | -1.4540 | cp | 1 | UNK | -0.109897 |
| 10 | C10 | 0.2820  | 1.2640  | -2.3560 | cp | 1 | UNK | -0.109897 |
| 11 | C11 | -3.5750 | 1.1260  | 1.1090  | ca | 1 | UNK | -0.362498 |
| 12 | C12 | 3.5380  | -1.1890 | -1.0180 | ca | 1 | UNK | -0.362498 |
| 13 | C13 | -2.9300 | 0.1910  | 0.2430  | ca | 1 | UNK | 0.211056  |
| 14 | C14 | 2.8910  | -0.2490 | -0.1600 | ca | 1 | UNK | 0.211056  |
| 15 | C15 | -1.4910 | 4.1700  | 0.2530  | ca | 1 | UNK | 0.232800  |
| 16 | C16 | 1.4550  | -0.6000 | -4.1250 | ca | 1 | UNK | 0.232800  |
| 17 | C17 | 0.1280  | 3.5680  | -1.4370 | ca | 1 | UNK | 0.218351  |
| 18 | C18 | -0.1670 | 1.1310  | -3.6700 | ca | 1 | UNK | 0.218351  |
| 19 | C19 | -3.0820 | 2.4380  | 1.1160  | ca | 1 | UNK | 0.300049  |
| 20 | C20 | 3.0470  | -1.3090 | -2.3250 | ca | 1 | UNK | 0.300049  |
| 21 | C21 | -4.7170 | 0.6990  | 1.9100  | c  | 1 | UNK | 0.606903  |

|    |     |         |         |         |    |   |     |           |
|----|-----|---------|---------|---------|----|---|-----|-----------|
| 22 | C22 | 4.6820  | -1.9490 | -0.5230 | c  | 1 | UNK | 0.606903  |
| 23 | C23 | -5.1960 | -0.7230 | 1.7010  | c3 | 1 | UNK | -0.180543 |
| 24 | C24 | 5.1440  | -1.6400 | 0.8840  | c3 | 1 | UNK | -0.180543 |
| 25 | C25 | -4.0310 | -1.6240 | 1.3130  | c3 | 1 | UNK | 0.106752  |
| 26 | C26 | 3.9860  | -1.1540 | 1.7480  | c3 | 1 | UNK | 0.106752  |
| 27 | C27 | -5.9100 | -1.2480 | 2.9280  | c3 | 1 | UNK | -0.088340 |
| 28 | C28 | 5.8010  | -2.8490 | 1.5160  | c3 | 1 | UNK | -0.088340 |
| 29 | C29 | -4.4930 | -3.0280 | 0.9010  | c3 | 1 | UNK | 0.135834  |
| 30 | C30 | 4.4520  | -0.6080 | 3.1050  | c3 | 1 | UNK | 0.135834  |
| 31 | O1  | -5.3130 | 1.4530  | 2.6980  | o  | 1 | UNK | -0.580248 |
| 32 | O2  | 5.2910  | -2.7830 | -1.2140 | o  | 1 | UNK | -0.580248 |
| 33 | O3  | -3.3540 | -1.1190 | 0.1480  | os | 1 | UNK | -0.338327 |
| 34 | O4  | 3.3110  | -0.0390 | 1.1370  | os | 1 | UNK | -0.338327 |
| 35 | O5  | -2.0890 | 5.0620  | 1.1010  | oh | 1 | UNK | -0.459050 |
| 36 | O6  | 2.0550  | -1.5210 | -4.9410 | oh | 1 | UNK | -0.459050 |
| 37 | O7  | 1.1580  | 3.9080  | -2.2760 | oh | 1 | UNK | -0.478497 |
| 38 | O8  | -1.2000 | 1.9370  | -4.0820 | oh | 1 | UNK | -0.478497 |
| 39 | O9  | -3.5690 | 3.4360  | 1.8950  | oh | 1 | UNK | -0.469651 |
| 40 | O10 | 3.5380  | -2.1680 | -3.2540 | oh | 1 | UNK | -0.469651 |
| 41 | O11 | -3.3930 | -3.8710 | 0.6450  | oh | 1 | UNK | -0.594512 |
| 42 | O12 | 4.2630  | -1.6500 | 4.0490  | oh | 1 | UNK | -0.594512 |
| 43 | H1  | -1.4160 | -0.2110 | -1.2350 | ha | 1 | UNK | 0.164102  |
| 44 | H2  | 1.3760  | 1.2560  | 0.1130  | ha | 1 | UNK | 0.164102  |
| 45 | H3  | -0.0680 | 5.5680  | -0.5890 | ha | 1 | UNK | 0.139749  |
| 46 | H4  | 0.0310  | 0.1150  | -5.5900 | ha | 1 | UNK | 0.139749  |
| 47 | H5  | -5.9240 | -0.6820 | 0.8390  | hc | 1 | UNK | 0.097103  |
| 48 | H6  | 5.9020  | -0.8090 | 0.7900  | hc | 1 | UNK | 0.097103  |
| 49 | H7  | -3.2850 | -1.6930 | 2.1520  | h1 | 1 | UNK | 0.068459  |
| 50 | H8  | 3.2400  | -1.9840 | 1.9030  | h1 | 1 | UNK | 0.068459  |
| 51 | H9  | -6.4850 | -2.1710 | 2.6770  | hc | 1 | UNK | 0.050539  |
| 52 | H10 | -6.6220 | -0.4770 | 3.3130  | hc | 1 | UNK | 0.050539  |
| 53 | H11 | -5.1790 | -1.4890 | 3.7370  | hc | 1 | UNK | 0.050539  |
| 54 | H12 | 6.1110  | -2.6130 | 2.5630  | hc | 1 | UNK | 0.050539  |
| 55 | H13 | 6.6960  | -3.1500 | 0.9190  | hc | 1 | UNK | 0.050539  |
| 56 | H14 | 5.0900  | -3.7100 | 1.5430  | hc | 1 | UNK | 0.050539  |
| 57 | H15 | -5.1570 | -2.9620 | -0.0010 | h1 | 1 | UNK | 0.059805  |
| 58 | H16 | -5.0400 | -3.5110 | 1.7530  | h1 | 1 | UNK | 0.059805  |
| 59 | H17 | 3.8420  | 0.2950  | 3.3770  | h1 | 1 | UNK | 0.059805  |
| 60 | H18 | 5.5380  | -0.3270 | 3.0710  | h1 | 1 | UNK | 0.059805  |
| 61 | H19 | -1.6620 | 5.9250  | 0.9840  | ho | 1 | UNK | 0.419649  |
| 62 | H20 | 1.6270  | -1.4800 | -5.8110 | ho | 1 | UNK | 0.419649  |
| 63 | H21 | 1.3530  | 4.8490  | -2.1500 | ho | 1 | UNK | 0.420800  |
| 64 | H22 | -1.3910 | 1.7320  | -5.0090 | ho | 1 | UNK | 0.420800  |
| 65 | H23 | -4.3040 | 3.1210  | 2.4500  | ho | 1 | UNK | 0.464000  |
| 66 | H24 | 4.2710  | -2.6950 | -2.8890 | ho | 1 | UNK | 0.464000  |
| 67 | H25 | -2.8750 | -3.4620 | -0.0610 | ho | 1 | UNK | 0.415580  |
| 68 | H26 | 4.2840  | -1.2400 | 4.9210  | ho | 1 | UNK | 0.415580  |

@<TRIPOS>BOND

|    |    |    |    |
|----|----|----|----|
| 1  | 1  | 5  | ar |
| 2  | 1  | 13 | ar |
| 3  | 2  | 6  | ar |
| 4  | 2  | 14 | ar |
| 5  | 3  | 15 | ar |
| 6  | 3  | 17 | ar |
| 7  | 4  | 16 | ar |
| 8  | 4  | 18 | ar |
| 9  | 5  | 7  | ar |
| 10 | 5  | 9  | ar |
| 11 | 6  | 8  | ar |
| 12 | 6  | 10 | ar |
| 13 | 7  | 15 | ar |
| 14 | 7  | 19 | ar |
| 15 | 8  | 16 | ar |
| 16 | 8  | 20 | ar |
| 17 | 9  | 10 | 1  |
| 18 | 9  | 17 | ar |
| 19 | 10 | 18 | ar |
| 20 | 11 | 13 | ar |

```

21 11 19 ar
22 11 21 1
23 12 14 ar
24 12 20 ar
25 12 22 1
26 13 33 1
27 14 34 1
28 15 35 1
29 16 36 1
30 17 37 1
31 18 38 1
32 19 39 1
33 20 40 1
34 21 23 1
35 21 31 2
36 22 24 1
37 22 32 2
38 23 25 1
39 23 27 1
40 24 26 1
41 24 28 1
42 25 29 1
43 25 33 1
44 26 30 1
45 26 34 1
46 29 41 1
47 30 42 1
48 1 43 1
49 2 44 1
50 3 45 1
51 4 46 1
52 23 47 1
53 24 48 1
54 25 49 1
55 26 50 1
56 27 51 1
57 27 52 1
58 27 53 1
59 28 54 1
60 28 55 1
61 28 56 1
62 29 57 1
63 29 58 1
64 30 59 1
65 30 60 1
66 35 61 1
67 36 62 1
68 37 63 1
69 38 64 1
70 39 65 1
71 40 66 1
72 41 67 1
73 42 68 1

```

@<TRIPOS>SUBSTRUCTURE

1 UNK 1 TEMP

0 \*\*\*\* \* 0 ROOT

**Hypothetical Compound 9H**

lig\_00000005.mol2

@<TRIPOS>MOLECULE

UNK

70 75 1 0 0

SMALL

No Charge or Current Charge

@<TRIPOS>ATOM

1 C1 -1.8530 0.5340 -0.6250 ca 1 UNK -0.22392



|    |     |         |         |         |    |   |     |           |
|----|-----|---------|---------|---------|----|---|-----|-----------|
| 2  | C2  | 1.8810  | 0.5340  | -0.6250 | ca | 1 | UNK | -0.223992 |
| 3  | C3  | -0.4070 | 4.5270  | -0.6250 | ca | 1 | UNK | -0.343795 |
| 4  | C4  | 0.4380  | 0.1780  | -4.6030 | ca | 1 | UNK | -0.343795 |
| 5  | C5  | -1.3640 | 1.8670  | -0.6410 | ca | 1 | UNK | 0.124944  |
| 6  | C6  | 1.3920  | 0.4300  | -1.9550 | ca | 1 | UNK | 0.124944  |
| 7  | C7  | -1.9580 | 2.8280  | 0.2220  | ca | 1 | UNK | -0.169696 |
| 8  | C8  | 1.9890  | -0.5130 | -2.8330 | ca | 1 | UNK | -0.169696 |
| 9  | C9  | -0.2870 | 2.2350  | -1.4970 | cp | 1 | UNK | -0.110695 |
| 10 | C10 | 0.3150  | 1.2500  | -2.3980 | cp | 1 | UNK | -0.110695 |
| 11 | C11 | -3.5450 | 1.1260  | 1.0600  | ca | 1 | UNK | -0.364868 |
| 12 | C12 | 3.5760  | -1.1980 | -1.0620 | ca | 1 | UNK | -0.364868 |
| 13 | C13 | -2.9050 | 0.1860  | 0.1950  | ca | 1 | UNK | 0.213680  |
| 14 | C14 | 2.9330  | -0.2530 | -0.2060 | ca | 1 | UNK | 0.213680  |
| 15 | C15 | -1.4520 | 4.1630  | 0.2080  | ca | 1 | UNK | 0.233604  |
| 16 | C16 | 1.4840  | -0.6190 | -4.1650 | ca | 1 | UNK | 0.233604  |
| 17 | C17 | 0.1660  | 3.5550  | -1.4800 | ca | 1 | UNK | 0.219999  |
| 18 | C18 | -0.1380 | 1.1140  | -3.7110 | ca | 1 | UNK | 0.219999  |
| 19 | C19 | -3.0440 | 2.4340  | 1.0730  | ca | 1 | UNK | 0.302400  |
| 20 | C20 | 3.0800  | -1.3220 | -2.3670 | ca | 1 | UNK | 0.302400  |
| 21 | C21 | -4.6780 | 0.6950  | 1.8670  | c  | 1 | UNK | 0.609527  |
| 22 | C22 | 4.7180  | -1.9580 | -0.5680 | c  | 1 | UNK | 0.609527  |
| 23 | C23 | -5.2330 | -0.6750 | 1.5530  | c3 | 1 | UNK | -0.205510 |
| 24 | C24 | 5.2140  | -1.6050 | 0.8170  | c3 | 1 | UNK | -0.205510 |
| 25 | C25 | -4.0960 | -1.6270 | 1.2060  | c3 | 1 | UNK | 0.111636  |
| 26 | C26 | 4.0620  | -1.1370 | 1.6960  | c3 | 1 | UNK | 0.111636  |
| 27 | C27 | -6.0910 | -1.1980 | 2.7060  | c3 | 1 | UNK | 0.139561  |
| 28 | C28 | 5.9540  | -2.7830 | 1.4500  | c3 | 1 | UNK | 0.139561  |
| 29 | C29 | -4.5820 | -2.9980 | 0.7190  | c3 | 1 | UNK | 0.132825  |
| 30 | C30 | 4.5470  | -0.5750 | 3.0390  | c3 | 1 | UNK | 0.132825  |
| 31 | O1  | -5.1910 | 1.3930  | 2.7610  | o  | 1 | UNK | -0.590070 |
| 32 | O2  | 5.2970  | -2.8270 | -1.2440 | o  | 1 | UNK | -0.590070 |
| 33 | O3  | -3.3230 | -1.1250 | 0.0990  | os | 1 | UNK | -0.336988 |
| 34 | O4  | 3.3570  | -0.0390 | 1.0890  | os | 1 | UNK | -0.336988 |
| 35 | O5  | -2.0500 | 5.0570  | 1.0540  | oh | 1 | UNK | -0.459593 |
| 36 | O6  | 2.0820  | -1.5410 | -4.9800 | oh | 1 | UNK | -0.459593 |
| 37 | O7  | 1.1990  | 3.8910  | -2.3190 | oh | 1 | UNK | -0.477902 |
| 38 | O8  | -1.1710 | 1.9180  | -4.1210 | oh | 1 | UNK | -0.477902 |
| 39 | O9  | -3.5290 | 3.4300  | 1.8580  | oh | 1 | UNK | -0.468142 |
| 40 | O10 | 3.5650  | -2.1860 | -3.2940 | oh | 1 | UNK | -0.468142 |
| 41 | O11 | -5.3480 | -1.3700 | 3.8930  | oh | 1 | UNK | -0.606487 |
| 42 | O12 | 6.9420  | -2.2410 | 2.3160  | oh | 1 | UNK | -0.606487 |
| 43 | O13 | -5.5180 | -2.8890 | -0.3300 | oh | 1 | UNK | -0.596740 |
| 44 | O14 | 3.4680  | -0.3990 | 3.9280  | oh | 1 | UNK | -0.596740 |
| 45 | H1  | -1.3870 | -0.2200 | -1.2760 | ha | 1 | UNK | 0.164560  |
| 46 | H2  | 1.4170  | 1.2520  | 0.0670  | ha | 1 | UNK | 0.164560  |
| 47 | H3  | -0.0240 | 5.5560  | -0.6330 | ha | 1 | UNK | 0.140204  |
| 48 | H4  | 0.0560  | 0.0930  | -5.6290 | ha | 1 | UNK | 0.140204  |
| 49 | H5  | -5.8990 | -0.5730 | 0.6470  | hc | 1 | UNK | 0.110218  |
| 50 | H6  | 5.9450  | -0.7520 | 0.6940  | hc | 1 | UNK | 0.110218  |
| 51 | H7  | -3.4170 | -1.7560 | 2.0940  | h1 | 1 | UNK | 0.075068  |
| 52 | H8  | 3.3270  | -1.9730 | 1.8660  | h1 | 1 | UNK | 0.075068  |
| 53 | H9  | -6.4920 | -2.2180 | 2.4600  | h1 | 1 | UNK | 0.055359  |
| 54 | H10 | -6.9430 | -0.4850 | 2.8740  | h1 | 1 | UNK | 0.055359  |
| 55 | H11 | 6.4400  | -3.4080 | 0.6520  | h1 | 1 | UNK | 0.055359  |
| 56 | H12 | 5.2480  | -3.4230 | 2.0450  | h1 | 1 | UNK | 0.055359  |
| 57 | H13 | -5.1210 | -3.5270 | 1.5490  | h1 | 1 | UNK | 0.068788  |
| 58 | H14 | -3.6940 | -3.6030 | 0.3910  | h1 | 1 | UNK | 0.068788  |
| 59 | H15 | 5.0880  | 0.3930  | 2.8720  | h1 | 1 | UNK | 0.068788  |
| 60 | H16 | 5.2290  | -1.3180 | 3.5350  | h1 | 1 | UNK | 0.068788  |
| 61 | H17 | -1.6170 | 5.9180  | 0.9430  | ho | 1 | UNK | 0.420255  |
| 62 | H18 | 1.6530  | -1.5020 | -5.8490 | ho | 1 | UNK | 0.420255  |
| 63 | H19 | 1.3980  | 4.8310  | -2.1910 | ho | 1 | UNK | 0.421255  |
| 64 | H20 | -1.3620 | 1.7140  | -5.0490 | ho | 1 | UNK | 0.421255  |
| 65 | H21 | -4.2580 | 3.1080  | 2.4180  | ho | 1 | UNK | 0.462860  |
| 66 | H22 | 4.3060  | -2.7050 | -2.9360 | ho | 1 | UNK | 0.462860  |
| 67 | H23 | -5.1320 | -0.4860 | 4.2230  | ho | 1 | UNK | 0.411952  |
| 68 | H24 | 7.5310  | -2.9670 | 2.5510  | ho | 1 | UNK | 0.411952  |
| 69 | H25 | -5.0710 | -2.4470 | -1.0630 | ho | 1 | UNK | 0.411638  |

70 H26 2.8720 0.2480 3.5290 ho 1 UNK 0.411638  
@<TRIPOS>BOND

|    |    |    |    |
|----|----|----|----|
| 1  | 1  | 5  | ar |
| 2  | 1  | 13 | ar |
| 3  | 2  | 6  | ar |
| 4  | 2  | 14 | ar |
| 5  | 3  | 15 | ar |
| 6  | 3  | 17 | ar |
| 7  | 4  | 16 | ar |
| 8  | 4  | 18 | ar |
| 9  | 5  | 7  | ar |
| 10 | 5  | 9  | ar |
| 11 | 6  | 8  | ar |
| 12 | 6  | 10 | ar |
| 13 | 7  | 15 | ar |
| 14 | 7  | 19 | ar |
| 15 | 8  | 16 | ar |
| 16 | 8  | 20 | ar |
| 17 | 9  | 10 | l  |
| 18 | 9  | 17 | ar |
| 19 | 10 | 18 | ar |
| 20 | 11 | 13 | ar |
| 21 | 11 | 19 | ar |
| 22 | 11 | 21 | l  |
| 23 | 12 | 14 | ar |
| 24 | 12 | 20 | ar |
| 25 | 12 | 22 | l  |
| 26 | 13 | 33 | l  |
| 27 | 14 | 34 | l  |
| 28 | 15 | 35 | l  |
| 29 | 16 | 36 | l  |
| 30 | 17 | 37 | l  |
| 31 | 18 | 38 | l  |
| 32 | 19 | 39 | l  |
| 33 | 20 | 40 | l  |
| 34 | 21 | 23 | l  |
| 35 | 21 | 31 | 2  |
| 36 | 22 | 24 | l  |
| 37 | 22 | 32 | 2  |
| 38 | 23 | 25 | l  |
| 39 | 23 | 27 | l  |
| 40 | 24 | 26 | l  |
| 41 | 24 | 28 | l  |
| 42 | 25 | 29 | l  |
| 43 | 25 | 33 | l  |
| 44 | 26 | 30 | l  |
| 45 | 26 | 34 | l  |
| 46 | 27 | 41 | l  |
| 47 | 28 | 42 | l  |
| 48 | 29 | 43 | l  |
| 49 | 30 | 44 | l  |
| 50 | 1  | 45 | l  |
| 51 | 2  | 46 | l  |
| 52 | 3  | 47 | l  |
| 53 | 4  | 48 | l  |
| 54 | 23 | 49 | l  |
| 55 | 24 | 50 | l  |
| 56 | 25 | 51 | l  |
| 57 | 26 | 52 | l  |
| 58 | 27 | 53 | l  |
| 59 | 27 | 54 | l  |
| 60 | 28 | 55 | l  |
| 61 | 28 | 56 | l  |
| 62 | 29 | 57 | l  |
| 63 | 29 | 58 | l  |
| 64 | 30 | 59 | l  |
| 65 | 30 | 60 | l  |
| 66 | 35 | 61 | l  |

67 36 62 1  
 68 37 63 1  
 69 38 64 1  
 70 39 65 1  
 71 40 66 1  
 72 41 67 1  
 73 42 68 1  
 74 43 69 1  
 75 44 70 1

@<TRIPOS>SUBSTRUCTURE

1 UNK 1 TEMP 0 \*\*\*\* \*\*\*\* 0 ROOT

**Talaroderxine A (2)**

lig\_00000006.mol2

@<TRIPOS>MOLECULE

UNK

72 77 1 0 0

SMALL

No Charge or Current Charge

@<TRIPOS>ATOM

|    |     |         |         |         |    |   |     |           |
|----|-----|---------|---------|---------|----|---|-----|-----------|
| 1  | C1  | -1.8620 | 0.8320  | -0.8980 | ca | 1 | UNK | -0.181185 |
| 2  | C2  | 1.8600  | 0.8320  | -0.8980 | ca | 1 | UNK | -0.181185 |
| 3  | C3  | -0.4420 | 4.8390  | -0.8980 | ca | 1 | UNK | -0.335804 |
| 4  | C4  | 0.4410  | 0.5280  | -4.8940 | ca | 1 | UNK | -0.335804 |
| 5  | C5  | -1.3690 | 2.1710  | -0.9050 | ca | 1 | UNK | 0.098425  |
| 6  | C6  | 1.3670  | 0.7380  | -2.2330 | ca | 1 | UNK | 0.098425  |
| 7  | C7  | -1.9620 | 3.1210  | -0.0350 | ca | 1 | UNK | -0.146070 |
| 8  | C8  | 1.9610  | -0.2020 | -3.1150 | ca | 1 | UNK | -0.146070 |
| 9  | C9  | -0.3030 | 2.5490  | -1.7700 | cp | 1 | UNK | -0.106387 |
| 10 | C10 | 0.3010  | 1.5710  | -2.6760 | cp | 1 | UNK | -0.106387 |
| 11 | C11 | -3.4840 | 1.3900  | 0.8260  | ca | 1 | UNK | -0.312707 |
| 12 | C12 | 3.4830  | -0.9290 | -1.3230 | ca | 1 | UNK | -0.312707 |
| 13 | C13 | -2.8820 | 0.4550  | -0.0660 | ca | 1 | UNK | 0.011390  |
| 14 | C14 | 2.8810  | 0.0310  | -0.4590 | ca | 1 | UNK | 0.011390  |
| 15 | C15 | -1.4750 | 4.4640  | -0.0540 | ca | 1 | UNK | 0.226417  |
| 16 | C16 | 1.4740  | -0.2850 | -4.4550 | ca | 1 | UNK | 0.226417  |
| 17 | C17 | 0.1360  | 3.8740  | -1.7560 | ca | 1 | UNK | 0.213640  |
| 18 | C18 | -0.1370 | 1.4560  | -3.9970 | ca | 1 | UNK | 0.213640  |
| 19 | C19 | -3.0370 | 2.7110  | 0.8260  | ca | 1 | UNK | 0.281434  |
| 20 | C20 | 3.0360  | -1.0300 | -2.6410 | ca | 1 | UNK | 0.281434  |
| 21 | C21 | -4.5710 | 0.9380  | 1.6910  | c  | 1 | UNK | 0.751879  |
| 22 | C22 | 4.5700  | -1.7570 | -0.8070 | c  | 1 | UNK | 0.751879  |
| 23 | C23 | -3.4210 | -0.9310 | -0.0770 | c3 | 1 | UNK | -0.077832 |
| 24 | C24 | 3.4200  | 0.1490  | 0.9220  | c3 | 1 | UNK | -0.077832 |
| 25 | C25 | -3.8960 | -1.3360 | 1.3110  | c3 | 1 | UNK | 0.150113  |
| 26 | C26 | 3.8960  | -1.2040 | 1.4310  | c3 | 1 | UNK | 0.150113  |
| 27 | C27 | -4.3380 | -5.1570 | 1.3190  | c3 | 1 | UNK | -0.092996 |
| 28 | C28 | 4.3410  | -0.9200 | 5.2410  | c3 | 1 | UNK | -0.092996 |
| 29 | C29 | -4.6140 | -2.6810 | 1.3100  | c3 | 1 | UNK | -0.091266 |
| 30 | C30 | 4.6150  | -1.1010 | 2.7720  | c3 | 1 | UNK | -0.091266 |
| 31 | C31 | -3.6280 | -3.8280 | 1.3360  | c3 | 1 | UNK | -0.080243 |
| 32 | C32 | 3.6290  | -1.0390 | 3.9180  | c3 | 1 | UNK | -0.080243 |
| 33 | O1  | -5.3450 | 1.6480  | 2.3490  | o  | 1 | UNK | -0.626078 |
| 34 | O2  | 5.3440  | -2.4670 | -1.4650 | o  | 1 | UNK | -0.626078 |
| 35 | O3  | -4.8510 | -0.3960 | 1.8390  | os | 1 | UNK | -0.404076 |
| 36 | O4  | 4.8510  | -1.8020 | 0.5340  | os | 1 | UNK | -0.404076 |
| 37 | O5  | -2.0750 | 5.3470  | 0.8000  | oh | 1 | UNK | -0.456683 |
| 38 | O6  | 2.0740  | -1.2040 | -5.2710 | oh | 1 | UNK | -0.456683 |
| 39 | O7  | 1.1620  | 4.2190  | -2.6000 | oh | 1 | UNK | -0.478251 |
| 40 | O8  | -1.1630 | 2.2720  | -4.4050 | oh | 1 | UNK | -0.478251 |
| 41 | O9  | -3.5430 | 3.6940  | 1.6150  | oh | 1 | UNK | -0.470312 |
| 42 | O10 | 3.5420  | -1.8910 | -3.5610 | oh | 1 | UNK | -0.470312 |
| 43 | H1  | -1.4010 | 0.1040  | -1.5840 | ha | 1 | UNK | 0.151181  |
| 44 | H2  | 1.3990  | 1.5710  | -0.2250 | ha | 1 | UNK | 0.151181  |
| 45 | H3  | -0.0740 | 5.8740  | -0.9110 | ha | 1 | UNK | 0.141178  |

|    |     |         |         |         |    |   |     |          |
|----|-----|---------|---------|---------|----|---|-----|----------|
| 46 | H4  | 0.0720  | 0.4620  | -5.9260 | ha | 1 | UNK | 0.141178 |
| 47 | H5  | -4.2800 | -0.9780 | -0.8020 | hc | 1 | UNK | 0.074121 |
| 48 | H6  | -2.6430 | -1.6600 | -0.4240 | hc | 1 | UNK | 0.074121 |
| 49 | H7  | 4.2790  | 0.8750  | 0.9130  | hc | 1 | UNK | 0.074121 |
| 50 | H8  | 2.6420  | 0.5490  | 1.6230  | hc | 1 | UNK | 0.074121 |
| 51 | H9  | -3.0230 | -1.3560 | 2.0240  | h1 | 1 | UNK | 0.066235 |
| 52 | H10 | 3.0240  | -1.9140 | 1.5060  | h1 | 1 | UNK | 0.066235 |
| 53 | H11 | -3.5970 | -5.9920 | 1.3430  | hc | 1 | UNK | 0.035741 |
| 54 | H12 | -4.9590 | -5.2610 | 0.3960  | hc | 1 | UNK | 0.035741 |
| 55 | H13 | -5.0110 | -5.2550 | 2.2060  | hc | 1 | UNK | 0.035741 |
| 56 | H14 | 3.6000  | -0.8800 | 6.0760  | hc | 1 | UNK | 0.035741 |
| 57 | H15 | 4.9600  | 0.0090  | 5.2740  | hc | 1 | UNK | 0.035741 |
| 58 | H16 | 5.0130  | -1.7960 | 5.4070  | hc | 1 | UNK | 0.035741 |
| 59 | H17 | -5.2820 | -2.7310 | 2.2120  | hc | 1 | UNK | 0.059565 |
| 60 | H18 | -5.2720 | -2.7560 | 0.4060  | hc | 1 | UNK | 0.059565 |
| 61 | H19 | 5.2830  | -1.9960 | 2.8900  | hc | 1 | UNK | 0.059565 |
| 62 | H20 | 5.2730  | -0.1930 | 2.7770  | hc | 1 | UNK | 0.059565 |
| 63 | H21 | -2.9420 | -3.7560 | 0.4510  | hc | 1 | UNK | 0.043355 |
| 64 | H22 | -2.9890 | -3.7550 | 2.2570  | hc | 1 | UNK | 0.043355 |
| 65 | H23 | 2.9420  | -0.1620 | 3.7790  | hc | 1 | UNK | 0.043355 |
| 66 | H24 | 2.9910  | -1.9620 | 3.9160  | hc | 1 | UNK | 0.043355 |
| 67 | H25 | -1.6670 | 6.2190  | 0.6720  | ho | 1 | UNK | 0.420592 |
| 68 | H26 | 1.6660  | -1.1430 | -6.1500 | ho | 1 | UNK | 0.420592 |
| 69 | H27 | 1.3350  | 5.1670  | -2.4930 | ho | 1 | UNK | 0.421878 |
| 70 | H28 | -1.3360 | 2.0930  | -5.3420 | ho | 1 | UNK | 0.421878 |
| 71 | H29 | -4.2980 | 3.3590  | 2.1340  | ho | 1 | UNK | 0.464224 |
| 72 | H30 | 4.2970  | -2.3830 | -3.1880 | ho | 1 | UNK | 0.464224 |

@<TRIPOS>BOND

|    |    |    |    |
|----|----|----|----|
| 1  | 1  | 5  | ar |
| 2  | 1  | 13 | ar |
| 3  | 2  | 6  | ar |
| 4  | 2  | 14 | ar |
| 5  | 3  | 15 | ar |
| 6  | 3  | 17 | ar |
| 7  | 4  | 16 | ar |
| 8  | 4  | 18 | ar |
| 9  | 5  | 7  | ar |
| 10 | 5  | 9  | ar |
| 11 | 6  | 8  | ar |
| 12 | 6  | 10 | ar |
| 13 | 7  | 15 | ar |
| 14 | 7  | 19 | ar |
| 15 | 8  | 16 | ar |
| 16 | 8  | 20 | ar |
| 17 | 9  | 10 | l  |
| 18 | 9  | 17 | ar |
| 19 | 10 | 18 | ar |
| 20 | 11 | 13 | ar |
| 21 | 11 | 19 | ar |
| 22 | 11 | 21 | l  |
| 23 | 12 | 14 | ar |
| 24 | 12 | 20 | ar |
| 25 | 12 | 22 | l  |
| 26 | 13 | 23 | l  |
| 27 | 14 | 24 | l  |
| 28 | 15 | 37 | l  |
| 29 | 16 | 38 | l  |
| 30 | 17 | 39 | l  |
| 31 | 18 | 40 | l  |
| 32 | 19 | 41 | l  |
| 33 | 20 | 42 | l  |
| 34 | 21 | 33 | 2  |
| 35 | 21 | 35 | 1  |
| 36 | 22 | 34 | 2  |
| 37 | 22 | 36 | 1  |
| 38 | 23 | 25 | 1  |
| 39 | 24 | 26 | 1  |
| 40 | 25 | 29 | 1  |

```

41  25  35  1
42  26  30  1
43  26  36  1
44  27  31  1
45  28  32  1
46  29  31  1
47  30  32  1
48   1  43  1
49   2  44  1
50   3  45  1
51   4  46  1
52  23  47  1
53  23  48  1
54  24  49  1
55  24  50  1
56  25  51  1
57  26  52  1
58  27  53  1
59  27  54  1
60  27  55  1
61  28  56  1
62  28  57  1
63  28  58  1
64  29  59  1
65  29  60  1
66  30  61  1
67  30  62  1
68  31  63  1
69  31  64  1
70  32  65  1
71  32  66  1
72  37  67  1
73  38  68  1
74  39  69  1
75  40  70  1
76  41  71  1
77  42  72  1

```

@<TRIPOS>SUBSTRUCTURE

```

1 UNK          1 TEMP          0 *****      0 ROOT

```

**Skyrin (6)**

lig\_00000007.mol2

@<TRIPOS>MOLECULE

UNK

```

58      63      1      0      0

```

SMALL

No Charge or Current Charge

@<TRIPOS>ATOM

|    |     |         |         |         |    |       |           |
|----|-----|---------|---------|---------|----|-------|-----------|
| 1  | C1  | -2.6540 | 0.9210  | 1.3920  | ca | 1 UNK | -0.127493 |
| 2  | C2  | 2.6520  | 0.9210  | 1.3920  | ca | 1 UNK | -0.127493 |
| 3  | C3  | -3.5580 | 3.1600  | 1.3920  | ca | 1 UNK | -0.160593 |
| 4  | C4  | 3.5570  | 0.0450  | 3.4520  | ca | 1 UNK | -0.160593 |
| 5  | C5  | -0.0600 | 0.5640  | -4.4750 | ca | 1 UNK | -0.261093 |
| 6  | C6  | 0.0600  | -4.3390 | -1.2320 | ca | 1 UNK | -0.261093 |
| 7  | C7  | -0.2330 | -0.7690 | -2.4230 | cp | 1 UNK | -0.041493 |
| 8  | C8  | 0.2320  | -1.9290 | -1.6560 | cp | 1 UNK | -0.041493 |
| 9  | C9  | -2.4870 | 0.9800  | 0.0160  | ca | 1 UNK | -0.087993 |
| 10 | C10 | 2.4860  | -0.3690 | 0.9080  | ca | 1 UNK | -0.087993 |
| 11 | C11 | -1.2480 | 0.0760  | -1.9780 | ca | 1 UNK | -0.030893 |
| 12 | C12 | 1.2470  | -1.8500 | -0.7040 | ca | 1 UNK | -0.030893 |
| 13 | C13 | -2.8500 | 2.1290  | -0.7180 | ca | 1 UNK | -0.232493 |
| 14 | C14 | 2.8490  | -1.4930 | 1.6780  | ca | 1 UNK | -0.232493 |
| 15 | C15 | -1.6570 | 1.2050  | -2.7290 | ca | 1 UNK | -0.268793 |
| 16 | C16 | 1.6570  | -2.9830 | 0.0400  | ca | 1 UNK | -0.268793 |
| 17 | C17 | -3.1820 | 2.0230  | 2.0910  | ca | 1 UNK | -0.021293 |

|    |     |         |         |         |    |   |     |           |
|----|-----|---------|---------|---------|----|---|-----|-----------|
| 18 | C18 | 3.1800  | 1.1330  | 2.6800  | ca | 1 | UNK | -0.021293 |
| 19 | C19 | -3.4090 | 3.2120  | -0.0150 | ca | 1 | UNK | 0.204507  |
| 20 | C20 | 3.4090  | -1.2710 | 2.9490  | ca | 1 | UNK | 0.204507  |
| 21 | C21 | 0.3610  | -0.5030 | -3.6900 | ca | 1 | UNK | 0.223807  |
| 22 | C22 | -0.3620 | -3.1990 | -1.9060 | ca | 1 | UNK | 0.223807  |
| 23 | C23 | -1.0790 | 1.4150  | -3.9980 | ca | 1 | UNK | 0.250407  |
| 24 | C24 | 1.0790  | -4.2330 | -0.2630 | ca | 1 | UNK | 0.250407  |
| 25 | C25 | -1.9530 | -0.2010 | -0.6990 | c  | 1 | UNK | 0.579107  |
| 26 | C26 | 1.9520  | -0.5640 | -0.4590 | c  | 1 | UNK | 0.579107  |
| 27 | C27 | -2.6300 | 2.1530  | -2.1710 | c  | 1 | UNK | 0.627107  |
| 28 | C28 | 2.6300  | -2.8400 | 1.1310  | c  | 1 | UNK | 0.627107  |
| 29 | C29 | -3.3390 | 1.9450  | 3.5620  | c3 | 1 | UNK | -0.063993 |
| 30 | C30 | 3.3370  | 2.5170  | 3.1840  | c3 | 1 | UNK | -0.063993 |
| 31 | O1  | -2.1130 | -1.3430 | -0.2530 | o  | 1 | UNK | -0.500093 |
| 32 | O2  | 2.1120  | 0.2930  | -1.3350 | o  | 1 | UNK | -0.500093 |
| 33 | O3  | -3.2190 | 2.9850  | -2.8930 | o  | 1 | UNK | -0.612593 |
| 34 | O4  | 3.2190  | -3.8300 | 1.6130  | o  | 1 | UNK | -0.612593 |
| 35 | O5  | -3.8320 | 4.3840  | -0.5730 | oh | 1 | UNK | -0.499393 |
| 36 | O6  | 3.8330  | -2.2430 | 3.8090  | oh | 1 | UNK | -0.499393 |
| 37 | O7  | 1.3450  | -1.3590 | -4.1050 | oh | 1 | UNK | -0.474793 |
| 38 | O8  | -1.3470 | -3.2450 | -2.8570 | oh | 1 | UNK | -0.474793 |
| 39 | O9  | -1.3970 | 2.4180  | -4.8640 | oh | 1 | UNK | -0.498393 |
| 40 | O10 | 1.3980  | -5.4230 | 0.3210  | oh | 1 | UNK | -0.498393 |
| 41 | H1  | -2.3810 | 0.0030  | 1.9370  | ha | 1 | UNK | 0.158307  |
| 42 | H2  | 2.3790  | 1.7820  | 0.7610  | ha | 1 | UNK | 0.158307  |
| 43 | H3  | -3.9840 | 4.0350  | 1.9060  | ha | 1 | UNK | 0.159207  |
| 44 | H4  | 3.9830  | 0.1750  | 4.4580  | ha | 1 | UNK | 0.159207  |
| 45 | H5  | 0.3850  | 0.7650  | -5.4600 | ha | 1 | UNK | 0.162307  |
| 46 | H6  | -0.3860 | -5.3240 | -1.4320 | ha | 1 | UNK | 0.162307  |
| 47 | H7  | -2.3560 | 1.7120  | 4.0430  | hc | 1 | UNK | 0.054240  |
| 48 | H8  | -3.7230 | 2.9060  | 3.9840  | hc | 1 | UNK | 0.054240  |
| 49 | H9  | -4.0590 | 1.1300  | 3.8270  | hc | 1 | UNK | 0.054240  |
| 50 | H10 | 2.3540  | 3.0520  | 3.1560  | hc | 1 | UNK | 0.054240  |
| 51 | H11 | 3.7180  | 2.5290  | 4.2340  | hc | 1 | UNK | 0.054240  |
| 52 | H12 | 4.0590  | 3.0790  | 2.5390  | hc | 1 | UNK | 0.054240  |
| 53 | H13 | -3.7800 | 4.3370  | -1.5420 | ho | 1 | UNK | 0.459807  |
| 54 | H14 | 3.7810  | -3.1160 | 3.3870  | ho | 1 | UNK | 0.459807  |
| 55 | H15 | 1.7110  | -1.0210 | -4.9370 | ho | 1 | UNK | 0.430307  |
| 56 | H16 | -1.7130 | -4.1440 | -2.8710 | ho | 1 | UNK | 0.430307  |
| 57 | H17 | -2.1480 | 2.9390  | -4.5340 | ho | 1 | UNK | 0.463807  |
| 58 | H18 | 2.1490  | -5.3220 | 0.9290  | ho | 1 | UNK | 0.463807  |

@<TRIPOS>BOND

|    |    |    |    |
|----|----|----|----|
| 1  | 1  | 9  | ar |
| 2  | 1  | 17 | ar |
| 3  | 2  | 10 | ar |
| 4  | 2  | 18 | ar |
| 5  | 3  | 17 | ar |
| 6  | 3  | 19 | ar |
| 7  | 4  | 18 | ar |
| 8  | 4  | 20 | ar |
| 9  | 5  | 21 | ar |
| 10 | 5  | 23 | ar |
| 11 | 6  | 22 | ar |
| 12 | 6  | 24 | ar |
| 13 | 7  | 8  | l  |
| 14 | 7  | 11 | ar |
| 15 | 7  | 21 | ar |
| 16 | 8  | 12 | ar |
| 17 | 8  | 22 | ar |
| 18 | 9  | 13 | ar |
| 19 | 9  | 25 | l  |
| 20 | 10 | 14 | ar |
| 21 | 10 | 26 | l  |
| 22 | 11 | 15 | ar |
| 23 | 11 | 25 | l  |
| 24 | 12 | 16 | ar |
| 25 | 12 | 26 | l  |
| 26 | 13 | 19 | ar |

```

27 13 27 1
28 14 20 ar
29 14 28 1
30 15 23 ar
31 15 27 1
32 16 24 ar
33 16 28 1
34 17 29 1
35 18 30 1
36 19 35 1
37 20 36 1
38 21 37 1
39 22 38 1
40 23 39 1
41 24 40 1
42 25 31 2
43 26 32 2
44 27 33 2
45 28 34 2
46 1 41 1
47 2 42 1
48 3 43 1
49 4 44 1
50 5 45 1
51 6 46 1
52 29 47 1
53 29 48 1
54 29 49 1
55 30 50 1
56 30 51 1
57 30 52 1
58 35 53 1
59 36 54 1
60 37 55 1
61 38 56 1
62 39 57 1
63 40 58 1

```

@<TRIPOS>SUBSTRUCTURE

```

1 UNK          1 TEMP          0 ***** 0 ROOT

```

**Cephalochromin (5)**

lig\_00000008.mol2

@<TRIPOS>MOLECULE

UNK

```

60      65      1      0      0

```

SMALL

No Charge or Current Charge

@<TRIPOS>ATOM

|    |     |         |         |         |    |       |           |
|----|-----|---------|---------|---------|----|-------|-----------|
| 1  | C1  | -1.8740 | 0.2170  | -0.2390 | ca | 1 UNK | -0.223805 |
| 2  | C2  | 1.8730  | 0.2170  | -0.2390 | ca | 1 UNK | -0.223805 |
| 3  | C3  | -0.4130 | 4.2040  | -0.2390 | ca | 1 UNK | -0.344005 |
| 4  | C4  | 0.4120  | -0.1630 | -4.2080 | ca | 1 UNK | -0.344005 |
| 5  | C5  | -1.3800 | 1.5480  | -0.2550 | ca | 1 UNK | 0.124095  |
| 6  | C6  | 1.3790  | 0.1060  | -1.5660 | ca | 1 UNK | 0.124095  |
| 7  | C7  | -1.9720 | 2.5110  | 0.6070  | ca | 1 UNK | -0.168805 |
| 8  | C8  | 1.9710  | -0.8430 | -2.4420 | ca | 1 UNK | -0.168805 |
| 9  | C9  | -0.3000 | 1.9110  | -1.1110 | cp | 1 UNK | -0.109305 |
| 10 | C10 | 0.2990  | 0.9230  | -2.0090 | cp | 1 UNK | -0.109305 |
| 11 | C11 | -3.5660 | 0.8160  | 1.4450  | ca | 1 UNK | -0.364405 |
| 12 | C12 | 3.5650  | -1.5150 | -0.6740 | ca | 1 UNK | -0.364405 |
| 13 | C13 | -2.9270 | -0.1280 | 0.5820  | ca | 1 UNK | 0.210995  |
| 14 | C14 | 2.9260  | -0.5670 | 0.1830  | ca | 1 UNK | 0.210995  |
| 15 | C15 | -1.4590 | 3.8440  | 0.5930  | ca | 1 UNK | 0.232295  |
| 16 | C16 | 1.4590  | -0.9570 | -3.7710 | ca | 1 UNK | 0.232295  |
| 17 | C17 | 0.1580  | 3.2290  | -1.0930 | ca | 1 UNK | 0.217945  |

|    |     |         |         |         |    |   |     |           |
|----|-----|---------|---------|---------|----|---|-----|-----------|
| 18 | C18 | -0.1590 | 0.7800  | -3.3190 | ca | 1 | UNK | 0.217945  |
| 19 | C19 | -3.0630 | 2.1230  | 1.4530  | ca | 1 | UNK | 0.298895  |
| 20 | C20 | 3.0630  | -1.6490 | -1.9750 | ca | 1 | UNK | 0.298895  |
| 21 | C21 | -4.7150 | 0.3970  | 2.2400  | c  | 1 | UNK | 0.605895  |
| 22 | C22 | 4.7150  | -2.2670 | -0.1820 | c  | 1 | UNK | 0.605895  |
| 23 | C23 | -5.2070 | -1.0030 | 2.0010  | c3 | 1 | UNK | -0.207605 |
| 24 | C24 | 5.2060  | -1.8950 | 1.1890  | c3 | 1 | UNK | -0.207605 |
| 25 | C25 | -4.0660 | -1.9330 | 1.6330  | c3 | 1 | UNK | 0.147095  |
| 26 | C26 | 4.0650  | -1.4410 | 2.0800  | c3 | 1 | UNK | 0.147095  |
| 27 | C27 | -4.5640 | -3.3100 | 1.2390  | c3 | 1 | UNK | -0.096705 |
| 28 | C28 | 4.5640  | -0.9170 | 3.4130  | c3 | 1 | UNK | -0.096705 |
| 29 | O1  | -5.2970 | 1.1340  | 3.0540  | o  | 1 | UNK | -0.583105 |
| 30 | O2  | 5.2960  | -3.1480 | -0.8380 | o  | 1 | UNK | -0.583105 |
| 31 | O3  | -3.3490 | -1.4390 | 0.4850  | os | 1 | UNK | -0.324405 |
| 32 | O4  | 3.3480  | -0.3460 | 1.4780  | os | 1 | UNK | -0.324405 |
| 33 | O5  | -2.0530 | 4.7410  | 1.4400  | oh | 1 | UNK | -0.460005 |
| 34 | O6  | 2.0530  | -1.8850 | -4.5820 | oh | 1 | UNK | -0.460005 |
| 35 | O7  | 1.1920  | 3.5630  | -1.9320 | oh | 1 | UNK | -0.478305 |
| 36 | O8  | -1.1930 | 1.5830  | -3.7310 | oh | 1 | UNK | -0.478305 |
| 37 | O9  | -3.5480 | 3.1230  | 2.2330  | oh | 1 | UNK | -0.470305 |
| 38 | O10 | 3.5480  | -2.5200 | -2.8960 | oh | 1 | UNK | -0.470305 |
| 39 | H1  | -1.4120 | -0.5390 | -0.8910 | ha | 1 | UNK | 0.164895  |
| 40 | H2  | 1.4110  | 0.9380  | 0.4510  | ha | 1 | UNK | 0.164895  |
| 41 | H3  | -0.0250 | 5.2310  | -0.2470 | ha | 1 | UNK | 0.138895  |
| 42 | H4  | 0.0250  | -0.2530 | -5.2310 | ha | 1 | UNK | 0.138895  |
| 43 | H5  | -5.7290 | -1.3870 | 2.9150  | hc | 1 | UNK | 0.087095  |
| 44 | H6  | -5.9570 | -0.9650 | 1.1650  | hc | 1 | UNK | 0.087095  |
| 45 | H7  | 5.7290  | -2.7690 | 1.6580  | hc | 1 | UNK | 0.087095  |
| 46 | H8  | 5.9570  | -1.0670 | 1.0710  | hc | 1 | UNK | 0.087095  |
| 47 | H9  | -3.3360 | -2.0060 | 2.4880  | h1 | 1 | UNK | 0.057095  |
| 48 | H10 | 3.3360  | -2.2850 | 2.2340  | h1 | 1 | UNK | 0.057095  |
| 49 | H11 | -3.7040 | -3.9540 | 0.9370  | hc | 1 | UNK | 0.052395  |
| 50 | H12 | -5.2720 | -3.2400 | 0.3800  | hc | 1 | UNK | 0.052395  |
| 51 | H13 | -5.0860 | -3.7740 | 2.1100  | hc | 1 | UNK | 0.052395  |
| 52 | H14 | 3.7040  | -0.5560 | 4.0260  | hc | 1 | UNK | 0.052395  |
| 53 | H15 | 5.2710  | -0.0680 | 3.2600  | hc | 1 | UNK | 0.052395  |
| 54 | H16 | 5.0850  | -1.7400 | 3.9570  | hc | 1 | UNK | 0.052395  |
| 55 | H17 | -1.6170 | 5.6000  | 1.3250  | ho | 1 | UNK | 0.418795  |
| 56 | H18 | 1.6170  | -1.8530 | -5.4480 | ho | 1 | UNK | 0.418795  |
| 57 | H19 | 1.3950  | 4.5010  | -1.8020 | ho | 1 | UNK | 0.419995  |
| 58 | H20 | -1.3960 | 1.3640  | -4.6530 | ho | 1 | UNK | 0.419995  |
| 59 | H21 | -4.2860 | 2.8080  | 2.7840  | ho | 1 | UNK | 0.462495  |
| 60 | H22 | 4.2850  | -3.0390 | -2.5300 | ho | 1 | UNK | 0.462495  |

@<TRIPOS>BOND

|    |    |    |    |
|----|----|----|----|
| 1  | 1  | 5  | ar |
| 2  | 1  | 13 | ar |
| 3  | 2  | 6  | ar |
| 4  | 2  | 14 | ar |
| 5  | 3  | 15 | ar |
| 6  | 3  | 17 | ar |
| 7  | 4  | 16 | ar |
| 8  | 4  | 18 | ar |
| 9  | 5  | 7  | ar |
| 10 | 5  | 9  | ar |
| 11 | 6  | 8  | ar |
| 12 | 6  | 10 | ar |
| 13 | 7  | 15 | ar |
| 14 | 7  | 19 | ar |
| 15 | 8  | 16 | ar |
| 16 | 8  | 20 | ar |
| 17 | 9  | 10 | l  |
| 18 | 9  | 17 | ar |
| 19 | 10 | 18 | ar |
| 20 | 11 | 13 | ar |
| 21 | 11 | 19 | ar |
| 22 | 11 | 21 | l  |
| 23 | 12 | 14 | ar |
| 24 | 12 | 20 | ar |



|    |    |    |   |
|----|----|----|---|
| 25 | 12 | 22 | 1 |
| 26 | 13 | 31 | 1 |
| 27 | 14 | 32 | 1 |
| 28 | 15 | 33 | 1 |
| 29 | 16 | 34 | 1 |
| 30 | 17 | 35 | 1 |
| 31 | 18 | 36 | 1 |
| 32 | 19 | 37 | 1 |
| 33 | 20 | 38 | 1 |
| 34 | 21 | 23 | 1 |
| 35 | 21 | 29 | 2 |
| 36 | 22 | 24 | 1 |
| 37 | 22 | 30 | 2 |
| 38 | 23 | 25 | 1 |
| 39 | 24 | 26 | 1 |
| 40 | 25 | 27 | 1 |
| 41 | 25 | 31 | 1 |
| 42 | 26 | 28 | 1 |
| 43 | 26 | 32 | 1 |
| 44 | 1  | 39 | 1 |
| 45 | 2  | 40 | 1 |
| 46 | 3  | 41 | 1 |
| 47 | 4  | 42 | 1 |
| 48 | 23 | 43 | 1 |
| 49 | 23 | 44 | 1 |
| 50 | 24 | 45 | 1 |
| 51 | 24 | 46 | 1 |
| 52 | 25 | 47 | 1 |
| 53 | 26 | 48 | 1 |
| 54 | 27 | 49 | 1 |
| 55 | 27 | 50 | 1 |
| 56 | 27 | 51 | 1 |
| 57 | 28 | 52 | 1 |
| 58 | 28 | 53 | 1 |
| 59 | 28 | 54 | 1 |
| 60 | 33 | 55 | 1 |
| 61 | 34 | 56 | 1 |
| 62 | 35 | 57 | 1 |
| 63 | 36 | 58 | 1 |
| 64 | 37 | 59 | 1 |
| 65 | 38 | 60 | 1 |

@<TRIPOS>SUBSTRUCTURE

1 UNK

1 TEMP

0 \*\*\*\*\* 0 ROOT

## REFERENCES

1. Kalb, S. R.; Smith, T. J.; Moura, H.; Hill, K.; Lou, J.; Geren, I. N.; Garcia-Rodriguez, C.; Marks, J. D.; Smith, L. A.; Pirkle, J. L.; Barr, J.R. The use of Endopep-MS to detect multiple subtypes of botulinum neurotoxins A, B, E, and F. *Int. J. Mass Spectrom.* **2008**, *278*, 101-108.
2. Schmidt, J. J.; Bostian, K. A. Endoproteinase activity of type A botulinum neurotoxin: substrate requirements and activation by serum albumin. *J. Protein Chem.* **1997**, *16*, 19-26.
3. Roxas-Duncan, V.; Enyedy, I.; Montgomery, V. A.; Eccard, V. S.; Carrington, M. A.; Lai, H.; Gul, N.; Yang, D. C.; Smith, L. A. Identification and biochemical characterization of small-molecule inhibitors of *Clostridium botulinum* neurotoxin serotype A. *Antimicrob. Agents. Chemother.* **2009**, *53*, 3478-3486.
4. Koyama, K.; Natori, S. Chaetochromins B, C and D, bis(naphtho-gamma-pyrone) derivatives from *Chaetomium gracile*. *Chem. Pharm. Bull.* **1987**, *35*, 578-584; Koyama, K.; Natori, S.; Iitaka, Y. Absolute configurations of chaetochromin A and related bis(naphtho- $\gamma$ -pyrone) mold metabolites. *Chem. Pharm. Bull.* **1987**, *35*, 4049-4055.
5. Suzuki, K.; Nozawa, K.; Nakajima, S; Udagawa, S.; Kawai, K. Isolation and structures of antibacterial binaphtho- $\alpha$ -pyrones, talaroderxines A and B, from *Talaromyces derxii*. *Chem. Pharm. Bull.* **1992**, *40*, 1116-1119.
6. Steffens, J. C.; Robeson, D.J. Secalonic acid A, a vivotoxin in pink root-infected onion. *Phytochemistry* **1987**, *26*, 1599-1602. Howard, C.C.; Johnstone, R.A.W. Fungal metabolites. Part I. Stereochemical features and mass spectrometry of secalonic acids. *J. Chem. Soc. Perkin Trans. I* **1973**, 2440-2444.
7. Hegde, V.R.; Miller, J. R.; Patel, M. G.; King, A. H.; Puar, M. S.; Horan, A.; Hart, R.; Yarborough, R.; Gullo, V. SCH 45752--an inhibitor of calmodulin-sensitive cyclic nucleotide phosphodiesterase activity. *J. Antibiot.* **1993**, *46*, 207-213; Kock, I.; Draeger, S.; Schulz, B.; Elsässer, B.; Tibor Kurtán, T.; Kenéz, A.; Antus, S.; Pescitelli, G.; Salvadori, P.; Speakman, J.-B.; Rheinheimer, J.; Krohn, K. Pseudoanguillosporin A and B: two new isochromans isolated from the endophytic fungus *Pseudoanguillospora* sp. *Eur. J. Org. Chem.* **2009**, 1427-1434.
8. Gill, M.; Gimenez, A.; McKenzie, R. W. Pigments of fungi, part 8. Bisanthraquinones from *Dermocybe austroveneta*. *J. Nat. Prod.* **1988**, *51*, 1251-1256. Antonowitz, A.; Gill, M.; Morgan, P. M.; Yu, J. Coupled anthraquinones from the toadstool *Dermocybe icterinoides*. *Phytochemistry* **1994**, *37*, 1679-1683; Koyama, K.; Aida, S.; Natori, S. Supplemental observations on atropisomerism of fungal bis(naphtho- $\gamma$ -pyrones). *Chem. Pharm. Bull.* **1990**, *38*, 2259-2261.
9. Cardellina, J. H.; Vieira, R. C.; Eccard, V.; Skerry, J.; Montgomery, V.; Campbell, Y.; Roxas-Duncan, V.; Leister, W.; LeClair, C. A.; Maloney, D. J.; Padula, D.; Pescitelli, G.; Khavrutskii, I.; Hu, X.; Wallqvist, A.; Smith, L. A. Separation of Betti reaction product enantiomers: Absolute configuration and inhibition of botulinum neurotoxin A. *ACS Med. Chem. Lett.* **2011**, *2*, 396.
10. Wang, J.; Wolf, R. M.; Caldwell, J. W.; Kollman, P. A.; Case, D. A. Development and testing of a general Amber force field. *J. Comput. Chem.* **2004**, *25*, 1157-1174.
11. Jakalian, A.; Bush, B. L.; Jack, D. B.; Bayly, C. I. Fast, efficient generation of high-quality atomic charges. AM1-BCC model: I. Method. *J. Comput. Chem.* **2000**, *21*, 132-146.
12. Jakalian, A.; Jack, D. B.; Bayly, C. I. Fast, efficient generation of high-quality atomic charges. AM1-BCC model: II. parameterization and validation. *J. Comput. Chem.* **2002**, *23*, 1623-1641.
13. Khavrutskii, I. V.; Wallqvist, A. Computing relative free energies of solvation using Single Reference Thermodynamic Integration augmented with Hamiltonian Replica Exchange. computing relative free

energies of solvation using Single Reference Thermodynamic Integration augmented with Hamiltonian Replica Exchange. *J. Chem. Theory Comput.* **2010**, *6*, 3427-3441.

14. Khavrutskii, I. V.; Wallqvist, A. Improved binding free energy predictions from Single-Reference Thermodynamic Integration augmented with Hamiltonian Replica Exchange. *J. Chem. Theory Comput.* **2011**, *7*, 3001-3011.

15. Trott, O.; Olson, A. J. AutoDock Vina: Improving the speed and accuracy of docking with a new scoring function, efficient optimization, and multithreading. *J. Comput. Chem.* **2010**, *31*, 455-461.

16. Hess, B.; Kutzner, C.; van der Spoel, D.; Lindahl, E. GROMACS 4: Algorithms for Highly Efficient, Load-Balanced, and Scalable Molecular Simulation. *J. Chem. Theory Comput.* **2008**, *4*, 435-447.

17. van der Spoel, D.; Lindahl, E.; Hess, B.; Kutzner, C.; van Buuren, A. R.; Apol, E.; Meulenhoff, P. J.; Tieleman, D. P.; Sijbers, A. L. T. M.; Feenstra, K. A.; Drunen, R. v.; Berendsen, H. J. C., GROMACS User Manual Version 4.0. 4.0 ed.; The GROMACS development team: AG Groningen, The Netherlands, 2006.

18. Clark, A. M.; Labute, P. Two-dimensional depiction of protein-ligand complexes. *J. Chem. Inf. Model.* **2007**, *47*, 1933-1944.
